# Supplementary material for: Mapping the probability of forest snow disturbances in Finland
Source: PubMed Central journal article supplement (PMC8321231; doi:10.1371/journal.pone.0254876), 2021-07-29

# PLOS ONE

## Mapping the probability of forest snow disturbances in Finland

--Manuscript Draft--

|                                                                                                                                                                                                                            |                                                                                                                                                                                                                                                                                                                                                                                                                                                                                                                                                                                                                                                                                                                                                                                                                                                                                                                                                                                                                                                                                                                                                                                                                                                                                                                                                                                                                                                                                                                                                                                                                                                                                                                                                                                                                                                                                                                                                       |
|----------------------------------------------------------------------------------------------------------------------------------------------------------------------------------------------------------------------------|-------------------------------------------------------------------------------------------------------------------------------------------------------------------------------------------------------------------------------------------------------------------------------------------------------------------------------------------------------------------------------------------------------------------------------------------------------------------------------------------------------------------------------------------------------------------------------------------------------------------------------------------------------------------------------------------------------------------------------------------------------------------------------------------------------------------------------------------------------------------------------------------------------------------------------------------------------------------------------------------------------------------------------------------------------------------------------------------------------------------------------------------------------------------------------------------------------------------------------------------------------------------------------------------------------------------------------------------------------------------------------------------------------------------------------------------------------------------------------------------------------------------------------------------------------------------------------------------------------------------------------------------------------------------------------------------------------------------------------------------------------------------------------------------------------------------------------------------------------------------------------------------------------------------------------------------------------|
| <b>Manuscript Number:</b>                                                                                                                                                                                                  | PONE-D-21-06232                                                                                                                                                                                                                                                                                                                                                                                                                                                                                                                                                                                                                                                                                                                                                                                                                                                                                                                                                                                                                                                                                                                                                                                                                                                                                                                                                                                                                                                                                                                                                                                                                                                                                                                                                                                                                                                                                                                                       |
| <b>Article Type:</b>                                                                                                                                                                                                       | Research Article                                                                                                                                                                                                                                                                                                                                                                                                                                                                                                                                                                                                                                                                                                                                                                                                                                                                                                                                                                                                                                                                                                                                                                                                                                                                                                                                                                                                                                                                                                                                                                                                                                                                                                                                                                                                                                                                                                                                      |
| <b>Full Title:</b>                                                                                                                                                                                                         | Mapping the probability of forest snow disturbances in Finland                                                                                                                                                                                                                                                                                                                                                                                                                                                                                                                                                                                                                                                                                                                                                                                                                                                                                                                                                                                                                                                                                                                                                                                                                                                                                                                                                                                                                                                                                                                                                                                                                                                                                                                                                                                                                                                                                        |
| <b>Short Title:</b>                                                                                                                                                                                                        | Mapping the probability of forest snow disturbances                                                                                                                                                                                                                                                                                                                                                                                                                                                                                                                                                                                                                                                                                                                                                                                                                                                                                                                                                                                                                                                                                                                                                                                                                                                                                                                                                                                                                                                                                                                                                                                                                                                                                                                                                                                                                                                                                                   |
| <b>Corresponding Author:</b>                                                                                                                                                                                               | Susanne Suvanto, Ph.D.<br>Natural Resources Institute Finland: Luonnonvarakeskus<br>Helsinki, FINLAND                                                                                                                                                                                                                                                                                                                                                                                                                                                                                                                                                                                                                                                                                                                                                                                                                                                                                                                                                                                                                                                                                                                                                                                                                                                                                                                                                                                                                                                                                                                                                                                                                                                                                                                                                                                                                                                 |
| <b>Keywords:</b>                                                                                                                                                                                                           | boreal forests; GIS; forest disturbance; forest damage; disturbance ecology                                                                                                                                                                                                                                                                                                                                                                                                                                                                                                                                                                                                                                                                                                                                                                                                                                                                                                                                                                                                                                                                                                                                                                                                                                                                                                                                                                                                                                                                                                                                                                                                                                                                                                                                                                                                                                                                           |
| <b>Abstract:</b>                                                                                                                                                                                                           | <p>The changing forest disturbance regimes emphasize the need for improved damage risk information. Here, our aim was to (1) improve the current understanding of snow damage risks by assessing the importance of abiotic factors, particularly the modelled snow load on trees, versus forest properties in predicting the probability of snow damage, (2) produce a snow damage probability map for Finland. We also compared the results for winters with typical snow load conditions and a winter with exceptionally heavy snow loads. To do this, we used damage observations from the Finnish national forest inventory (NFI) to create a statistical snow damage occurrence model, spatial data layers from different sources to use the model to predict the damage probability for the whole country in 16 x 16 m resolution. Snow damage reports from forest owners were used for testing the final map. Our results showed that best results were obtained when both abiotic and forest variables were included in the model. However, in the case of the high snow load winter, the model with only abiotic predictors performed nearly as well as the full model and the ability of the models to identify the snow damaged stands was higher than in other years. The results showed patterns of forest adaptation to high snow loads, as spruce stands in the north were less susceptible to damage than in southern areas and long-term snow load reduced the damage probability. The model and the derived wall-to-wall map were able to discriminate damage from no-damage cases on a good level. The damage probability mapping approach identifies the drivers of snow disturbances across forest landscapes and can be used to spatially estimate the current and future disturbance risks in forests, informing practical forestry and decision-making and supporting the adaptation to the changing disturbance regimes.</p> |
| <b>Order of Authors:</b>                                                                                                                                                                                                   | <p>Susanne Suvanto, Ph.D.</p> <p>Aleksi Lehtonen</p> <p>Seppo Nevalainen</p> <p>Ilari Lehtonen</p> <p>Heli Viiri</p> <p>Mikael Strandström</p> <p>Mikko Peltoniemi</p>                                                                                                                                                                                                                                                                                                                                                                                                                                                                                                                                                                                                                                                                                                                                                                                                                                                                                                                                                                                                                                                                                                                                                                                                                                                                                                                                                                                                                                                                                                                                                                                                                                                                                                                                                                                |
| <b>Additional Information:</b>                                                                                                                                                                                             |                                                                                                                                                                                                                                                                                                                                                                                                                                                                                                                                                                                                                                                                                                                                                                                                                                                                                                                                                                                                                                                                                                                                                                                                                                                                                                                                                                                                                                                                                                                                                                                                                                                                                                                                                                                                                                                                                                                                                       |
| <b>Question</b>                                                                                                                                                                                                            | <b>Response</b>                                                                                                                                                                                                                                                                                                                                                                                                                                                                                                                                                                                                                                                                                                                                                                                                                                                                                                                                                                                                                                                                                                                                                                                                                                                                                                                                                                                                                                                                                                                                                                                                                                                                                                                                                                                                                                                                                                                                       |
| <b>Financial Disclosure</b>                                                                                                                                                                                                | The research was funded from the project SÄÄTYÖ funded by the Ministry of Agriculture and Forestry of Finland. This project has received funding from the European Union's Horizon 2020 research and innovation programme under the Marie Skłodowska-Curie grant agreement No 895158.                                                                                                                                                                                                                                                                                                                                                                                                                                                                                                                                                                                                                                                                                                                                                                                                                                                                                                                                                                                                                                                                                                                                                                                                                                                                                                                                                                                                                                                                                                                                                                                                                                                                 |
| Enter a financial disclosure statement that describes the sources of funding for the work included in this submission. Review the <a href="#">submission guidelines</a> for detailed requirements. View published research |                                                                                                                                                                                                                                                                                                                                                                                                                                                                                                                                                                                                                                                                                                                                                                                                                                                                                                                                                                                                                                                                                                                                                                                                                                                                                                                                                                                                                                                                                                                                                                                                                                                                                                                                                                                                                                                                                                                                                       |

articles from [PLOS ONE](#) for specific examples.

This statement is required for submission and **will appear in the published article** if the submission is accepted. Please make sure it is accurate.

#### Unfunded studies

Enter: *The author(s) received no specific funding for this work.*

#### Funded studies

Enter a statement with the following details:

- Initials of the authors who received each award
- Grant numbers awarded to each author
- The full name of each funder
- URL of each funder website
- Did the sponsors or funders play any role in the study design, data collection and analysis, decision to publish, or preparation of the manuscript?
- **NO** - Include this sentence at the end of your statement: *The funders had no role in study design, data collection and analysis, decision to publish, or preparation of the manuscript.*
- **YES** - Specify the role(s) played.

\* typeset

#### Competing Interests

Use the instructions below to enter a competing interest statement for this submission. On behalf of all authors, disclose any [competing interests](#) that could be perceived to bias this work—acknowledging all financial support and any other relevant financial or non-financial competing interests.

This statement is **required** for submission and **will appear in the published article** if the submission is accepted. Please make sure it is accurate and that any funding sources listed in your Funding Information later in the submission form are also declared in your Financial Disclosure statement.

The authors have declared that no competing interests exist.

View published research articles from [PLOS ONE](#) for specific examples.

**NO authors have competing interests**

Enter: *The authors have declared that no competing interests exist.*

**Authors with competing interests**

Enter competing interest details beginning with this statement:

*I have read the journal's policy and the authors of this manuscript have the following competing interests: [insert competing interests here]*

\* typeset

**Ethics Statement**

N/A

Enter an ethics statement for this submission. This statement is required if the study involved:

- Human participants
- Human specimens or tissue
- Vertebrate animals or cephalopods
- Vertebrate embryos or tissues
- Field research

Write "N/A" if the submission does not require an ethics statement.

General guidance is provided below. Consult the [submission guidelines](#) for detailed instructions. **Make sure that all information entered here is included in the Methods section of the manuscript.**

## Format for specific study types

### Human Subject Research (involving human participants and/or tissue)

- Give the name of the institutional review board or ethics committee that approved the study
- Include the approval number and/or a statement indicating approval of this research
- Indicate the form of consent obtained (written/oral) or the reason that consent was not obtained (e.g. the data were analyzed anonymously)

### Animal Research (involving vertebrate animals, embryos or tissues)

- Provide the name of the Institutional Animal Care and Use Committee (IACUC) or other relevant ethics board that reviewed the study protocol, and indicate whether they approved this research or granted a formal waiver of ethical approval
- Include an approval number if one was obtained
- If the study involved *non-human primates*, add *additional details* about animal welfare and steps taken to ameliorate suffering
- If anesthesia, euthanasia, or any kind of animal sacrifice is part of the study, include briefly which substances and/or methods were applied

### Field Research

Include the following details if this study involves the collection of plant, animal, or other materials from a natural setting:

- Field permit number
- Name of the institution or relevant body that granted permission

### Data Availability

Authors are required to make all data underlying the findings described fully available, without restriction, and from the time of publication. PLOS allows rare exceptions to address legal and ethical concerns. See the [PLOS Data Policy](#) and [FAQ](#) for detailed information.

No - some restrictions will apply

A Data Availability Statement describing where the data can be found is required at submission. Your answers to this question constitute the Data Availability Statement and **will be published in the article**, if accepted.

**Important:** Stating 'data available on request from the author' is not sufficient. If your data are only available upon request, select 'No' for the first question and explain your exceptional situation in the text box.

Do the authors confirm that all data underlying the findings described in their manuscript are fully available without restriction?

**Describe where the data may be found in full sentences. If you are copying our sample text, replace any instances of XXX with the appropriate details.**

- If the data are **held or will be held in a public repository**, include URLs, accession numbers or DOIs. If this information will only be available after acceptance, indicate this by ticking the box below. For example: *All XXX files are available from the XXX database (accession number(s) XXX, XXX).*
- If the data are all contained **within the manuscript and/or Supporting Information files**, enter the following: *All relevant data are within the manuscript and its Supporting Information files.*
- If neither of these applies but you are able to provide **details of access elsewhere**, with or without limitations, please do so. For example:

*Data cannot be shared publicly because of [XXX]. Data are available from the XXX Institutional Data Access / Ethics Committee (contact via XXX) for researchers who meet the criteria for access to confidential data.*

*The data underlying the results presented in the study are available from (include the name of the third party*

The NFI field data was used here under a permission from the National Forest Inventory of Finland (within Natural Resources Institute Finland) that does not allow the authors to publicly share this data. The MS-NFI data is available for download under CC-BY 4.0 license from <http://kartta.luke.fi/index-en.html>, the data for snow load on tree crowns is available under CC-BY 4.0 license from <http://urn.fi/urn:nbn:fi:csc-kata20180329115425634000>, the DEMs are available under CC-BY 4.0 license from <https://tiedostopalvelu.maanmittauslaitos.fi/tp/kartta?lang=en>, the data on biogeographical regions in Finland are available under CC-BY 4.0 license from <https://ckan.ymparisto.fi/dataset/%7B664BE696-C6A5-4FC4-8D6A-7D2E63D0E9C6%7D>. The data from Finnish Forest Centre can be downloaded under CC-BY 4.0 license from <https://www.metsaan.fi/paikkatietoaineistot>.

*and contact information or URL).*

- This text is appropriate if the data are owned by a third party and authors do not have permission to share the data.

\* typeset

Additional data availability information:

1

2

# 3 Mapping the probability of forest snow 4 disturbances in Finland

5 Susanne Suvanto<sup>1\*</sup>, Aleksi Lehtonen<sup>1</sup>, Seppo Nevalainen<sup>2</sup>, Ilari Lehtonen<sup>3</sup>, Heli Viiri<sup>4</sup>, Mikael  
6 Strandström<sup>1</sup>, Mikko Peltoniemi<sup>1</sup>

7

8 <sup>1</sup> Natural Resources Institute Finland (Luke), Helsinki, Finland

9 <sup>2</sup> Natural Resources Institute Finland (Luke), Joensuu, Finland

10 <sup>3</sup> Finnish Meteorological Institute, Helsinki, Finland

11 <sup>4</sup> UPM Forest, Tampere, Finland

12

13 \* Corresponding author

14 Email: [susanne.suvanto@luke.fi](mailto:susanne.suvanto@luke.fi) (SS)

## 15 Abstract

16 The changing forest disturbance regimes emphasize the need for improved damage risk  
17 information. Here, our aim was to (1) improve the current understanding of snow damage risks  
18 by assessing the importance of abiotic factors, particularly the modelled snow load on trees,  
19 versus forest properties in predicting the probability of snow damage, (2) produce a snow  
20 damage probability map for Finland. We also compared the results for winters with typical  
21 snow load conditions and a winter with exceptionally heavy snow loads. To do this, we used  
22 damage observations from the Finnish national forest inventory (NFI) to create a statistical  
23 snow damage occurrence model, spatial data layers from different sources to use the model  
24 to predict the damage probability for the whole country in 16 x 16 m resolution. Snow damage  
25 reports from forest owners were used for testing the final map. Our results showed that best  
26 results were obtained when both abiotic and forest variables were included in the model.  
27 However, in the case of the high snow load winter, the model with only abiotic predictors  
28 performed nearly as well as the full model and the ability of the models to identify the snow  
29 damaged stands was higher than in other years. The results showed patterns of forest  
30 adaptation to high snow loads, as spruce stands in the north were less susceptible to damage  
31 than in southern areas and long-term snow load reduced the damage probability. The model  
32 and the derived wall-to-wall map were able to discriminate damage from no-damage cases **on**  
33 **a good** . The damage probability mapping approach identifies the drivers of snow  
34 disturbances across forest landscapes and can be used to spatially estimate the current and  
35 future disturbance risks in forests, informing practical forestry and decision-making and  
36 supporting the adaptation to the changing disturbance regimes.

## 37 Introduction

38 Forest disturbances caused by snow are frequent in high latitude regions [1-4] and high-  
39 altitude areas [5-7]. In Europe, the estimates of forest damage caused by snow disturbance



40 events range from 1 to 4 million m<sup>3</sup> of wood per year [8-9]. While climate warming may lead  
41 to reduced levels of snow disturbances [10] the future changes are likely to be spatially  
42 asymmetric. For example, snow damage is projected to decrease in southern and western  
43 Finland but in northern and eastern parts of the country heavy snow loads are expected to  
44 increase. This is because the warmer and more humid climate will increase the occurrence of  
45 wet snow hazard events and conditions favorable for rime accumulation in these areas [11-  
46 12].

47 Snow disturbances are an inherent part of the forest ecosystem in northern and high-altitude  
48 forests. They cause economic losses in terms of damaged wood and increased tree mortality.  
49 Snow disturbances in forests also damage the infrastructure; the power grid in particular is  
50 vulnerable as tree tops and trees with heavy crown snow loads fall on the power lines. Snow  
51 damaged trees and areas are also more susceptible to subsequent damage by insects or fungi  
52 [8]. Many of the negative effects of snow disturbances could potentially be alleviated by  
53 improved planning and forest management, but this requires accurate information about the  
54 damage risks. Spatial risk information is increasingly required by the society and it is used  
55 actively in management, operations and financial planning among owners, industry, and  
56 insurers.

57 Precise forest and climate data has made it possible to present risk information at high  
58 resolution. For example, Suvanto et al. [13], mapped forest wind damage probabilities in  
59 forests at 16 m x 16 m resolution, by using a model that drew from damage observations  
60 made in the Finnish national forest inventory (NFI), spatially identified high wind areas, and  
61 environmental and forest resource data from various open data sources. The high spatial  
62 resolution of the map allows the consideration of disturbance probability on the level of  
63 individual forest stands, i.e. the spatial unit in which the management decisions are being  
64 made. In northern forests, snow disturbances play an important role, and therefore a better  
65 understanding of how snow damage risks can be predicted at large scale but at high resolution  
66 is needed.

67 Snow damage to trees is induced when the forces generated by a large crown snow load,  
68 often together with wind, exceed the force required to break the stem of the tree.  
69 Meteorological data is crucial in modelling forest snow disturbances, as specific  
70 meteorological conditions are needed for snow to accumulate on trees. Typically snow  
71 accumulates to trees typically within a narrow temperature range close to 0 °C [14]. Conditions  
72 after the snowfall are important for the damage, as retention of snow in the tree crowns is  
73 temperature dependent [8]. As the accumulation of rime and snow on trees is driven by  
74 temperature and wind conditions, topographic factors are typically correlated to the occurrence  
75 of snow damage [8, 15]. Snow load on trees can be categorized in different types, such as  
76 rime, wet snow, dry snow and frozen snow, and the physical process of snow accumulation  
77 differs by the type. Lehtonen et al. [15] showed that improved results in modelling snow load  
78 in tree crowns could be achieved by considering the different snow load types separately.

79 The characteristics of the forest stand and the trees play an important role, as damage occurs  
80 when the gravitational forces and torque caused by the crown snow load exceed the stem  
81 tolerance limit. The tolerance is largely related to stem taper and characteristics of the tree  
82 crown, while these are driven by factors such as tree species and stand characteristics [8, 16].  
83 From a biomechanical perspective, older trees with stronger stem taper and thicker stems  
84 should be more resistant to crown snow loads than smaller trees with modest stem taper and  
85 thinner stems. The density of stand may indirectly affect the susceptibility of trees to damage,  
86 as density-driven competition drives the growth of thin and tall stems [8, 16].

87 Coniferous species are generally more susceptible to damage than deciduous trees, and  
88 Norway spruce is less vulnerable compared to Scots pine [8, 17]. Tree structural properties  
89 predisposing trees to damage vary also within species. In Norway spruce, the tree morphology  
90 varies across the species range so that in high altitude and latitude areas the narrow crown  
91 shape and dense, horizontal branches reduce the accumulation of snow on the crowns,  
92 decreasing the probability of snow damage [18-20].

93 In this study, our aim was to (1) assess the importance of meteorological and topographic  
94 factors versus forest properties for the occurrence probability of snow damage in forests,  
95 comparing results from winters with typical snow load conditions and an exceptionally heavy  
96 snow load winter, and (2) produce a snow damage probability map for Finland and test the  
97 ability of the map to identify the stands vulnerable to snow disturbances. As the meteorological  
98 variable, we used model-derived crown snow load, which should be the best proxy for  
99 damage-causing climatic conditions and which allows predicting snow damage risks ~~changes~~  
100 under climate change ~~conditions~~.

## 101 Material and methods

### 102 National forest inventory data

103 National forest inventory (NFI) data was used for the snow damage observations and for the  
104 forest characteristics data. The ~~used~~ data included plots from the 10th (2005-2008), 11th  
105 (2009-2013) and 12th (2014-2018) Finnish NFIs [21-22]. NFI10 measurements from 2004  
106 were excluded as no full 5 year period of snow load data was available before that year. To  
107 avoid having repeated measurements from the same plots in the data, only temporary NFI  
108 plots from NFI10 and NFI11 were included in the analysis, whereas all plots (temporary and  
109 permanent) were included from the NFI12. Only NFI plots on forest land were included and  
110 plots on treeless stands were excluded from the data. Data points with missing data in any of  
111 the used predictor variables were excluded in the analysis. The final data consisted of a total  
112 111 677 plots, in 2 380 of which snow damage was recorded (Table 1).

113 **Table 1.** *Statistics of stand level snow damage, damage severity and damage type in the*  
114 *NFI data.*

| All | 2005-2017 | 2018 |
|-----|-----------|------|
|-----|-----------|------|

---

|                                     |         |         |       |
|-------------------------------------|---------|---------|-------|
| Total number of plots               | 111 677 | 102 671 | 9 006 |
| Total damaged plots                 | 2 380   | 1 885   | 495   |
| % damaged plots                     | 2.13    | 1.84    | 5.50  |
| <b>Damage severity (% of cases)</b> |         |         |       |
| 0, slight damage                    | 57.4    | 59.4    | 49.9  |
| 1, moderate damage                  | 38.9    | 37.3    | 44.8  |
| 2, severe damage                    | 3.7     | 3.2     | 5.3   |
| <u>Damage type (% of cases)</u>     |         |         |       |
| Dead standing trees                 | 0.5     | 0.5     | 0.6   |
| <b>Uprooted or broken trees</b>     | 75.8    | 75.6    | 76.4  |
| Stem damage                         | 0.5     | 0.5     | 0.4   |
| Dead or broken crowns               | 12.3    | 10.6    | 18.8  |
| Other crown damage                  | 10.7    | 12.5    | 3.6   |
| Branch damage                       | 0.2     | 0.2     | 0.2   |
| Defoliation                         | <0.1    | 0.1     | --    |
| Discolouration                      | <0.1    | 0.1     | --    |

115

116 Stand level snow damage observations from the Finnish national forest inventory (NFI) were  
 117 used in the study. All damage cases that occurred in the dominant tree storey of the stand  
 118 (i.e., the tree storey that determines silvicultural operations for the stand) and where the causal  
 119 agent of the primary damage had been classified as “snow” and the timing of the damage was  
 120 estimated to be within 5 years were included as damage in the analysis.

121 The damage type was most often fallen or broken trees (no distinction of these two are made  
122 in the data) but also other damage types were found (Table 1). Damage severity is recorded  
123 in the NFI as cumulative effect of all damage agents found in the stand, and no information  
124 about the severity of snow damage specifically is included if also other damage causes were  
125 present. Severity is assessed on a four-point scale (0 to 3) and most stands with snow damage  
126 are classified to the two lowest classes (0 = modest damage, does not affect the silvicultural  
127 quality of the stand or change the development class, and 1 = moderate damage, lowers the  
128 silvicultural quality of the stand by one class), with some observations in class second highest  
129 class (2 = severe damage, decreases the quality of the stand by more than one class) and no  
130 observations in the highest damage severity class (3 = complete damage, immediate  
131 regeneration required; Table 1).

132 Other information from the NFI used in our analysis included stand dominant tree species,  
133 average tree height and diameter at breast height (DBH) in stand, basal area, forest  
134 management operations (thinning, tending of seedling stands) and their timing, site type and  
135 proportions of basal area represented by different species (Table 2). From the species data  
136 we derived variables describing the total number of tree species in the plot, proportion of basal  
137 area covered by the species with the highest basal area and the Shannon diversity index,  
138 which was also calculated from shares of basal area for each species.

139 Stand average DBH was not recorded for stands of development class “young seedling stand”,  
140 where the height of the dominant tree species is less than 1.3 meters. For these stands DBH  
141 was set to 0 cm. In NFI10, DBH was also missing for the development class “advanced  
142 seedling stand”. For these, the DBH was estimated based on the measurements in NFI11 and  
143 NFI12. DBH in this development class was predicted based on average tree height and  
144 dominant tree species by fitting a GLM model with gamma distribution and log-link function to  
145 the NFI11 and NFI12 data where the DBH was available, and then using this model to predict  
146 the DBH values for the advanced seedling stands in NFI10 where the DBH information was  
147 missing.

148 **Table 2.** Number of plots and the descriptive statistics for forest, topographical and snow load  
 149 variables included in the final model for damaged and non-damaged plots separately and for  
 150 all the plots in the data. For categorical variables values represent percentages of plots in  
 151 each class and for continuous variables mean and standard deviation, the latter in parenthesis.

|                                                 | Description                                                    | Damaged     | Non-damaged | All          |
|-------------------------------------------------|----------------------------------------------------------------|-------------|-------------|--------------|
|                                                 | Number of plots                                                | 2 380       | 109 297     | 111 677      |
| <u>FOREST</u>                                   |                                                                |             |             |              |
| Species                                         | dominant species of the stand                                  |             |             |              |
| <i>pine</i>                                     |                                                                | 73.1%       | 61.4%       | 61.6%        |
| <i>spruce</i>                                   |                                                                | 19.3%       | 27.7%       | 27.6%        |
| <i>other</i>                                    |                                                                | 7.6%        | 10.9%       | 10.8%        |
| <b>DBH</b><br>(cm)                              | stand average DBH                                              | 16.1 (5.8)  | 16.1 (8.6)  | 16.11 (8.57) |
| BasalArea<br>(m <sup>2</sup> ha <sup>-1</sup> ) | basal area of trees                                            | 18.9 (8.0)  | 16.8 (9.6)  | 16.8 (9.5)   |
| NorthBoreal                                     | Plot located in the north boreal zone                          | 20.1%       | 12.3%       | 12.5%        |
| <u>ABIOTIC</u>                                  |                                                                |             |             |              |
| Snowload<br>(kg m <sup>-2</sup> )               | max crown snow load, within 5 years before the NFI measurement | 64.6 (29.6) | 49.3 (16.2) | 49.7 (16.7)  |
| SnowloadLongterm<br>(kg m <sup>-2</sup> )       | Average of winter maximum snow load in 2000 to 2015            | 38.1 (6.8)  | 34.5 (7.40) | 34.6 (7.4)   |
| RelativeElevation<br>(m)                        | difference to mean elevation in 1 km radius                    | 3.1 (9.5)   | 1.2 (7.3)   | 1.2 (7.4)    |

|                        |                         |             |              |              |
|------------------------|-------------------------|-------------|--------------|--------------|
| Altitude<br>(m.a.s.l.) | altitude from sea level | 165.3(73.1) | 130.5 (68.7) | 131.2 (69.0) |
|------------------------|-------------------------|-------------|--------------|--------------|

---

152

## 153 Snow load on trees

154 Maximum snow load on tree canopies was calculated for each winter for years 2001 to 2018,  
155 using the snow load model of the Finnish Meteorological Institute (FMI) [15] and the ERA5  
156 reanalysis data [23].

157 The snow-load model is a statistical model in operational use at the FMI. The model assumes  
158 a tree with cone-shaped crown with a projected catchment area of one square meter from  
159 above and from the side in the direction of the wind and calculates the snow load on tree  
160 canopies in four different snow accumulation types: rime, dry snow, wet snow and frozen snow  
161 [15]. Here, the sum of the different snow load types was used, and the maximum snow load  
162 of the previous five years from the NFI measurement date was used for each NFI plot, as the  
163 snow damage observed on the plots may have occurred within 5 previous years.

## 164 Topographic variables

165 Altitude as meters above sea level was extracted for the NFI plot locations from the 25 meter  
166 resolution digital elevation model (DEM) from the National Survey of Finland. Relative  
167 elevation was calculated from the same DEM as the difference between the altitude at the plot  
168 location and the average altitude within 1 kilometer radius. Thus, negative values of the  
169 variable represent with topographic positions lower than the near surroundings and positive  
170 values higher.

## 171 Statistical modelling

172 Statistical models were fitted using the occurrence of snow damage in the NFI plots as the  
173 binary response variable and forest properties, snow load data and topographic variables as

174 predictors. Only snow damage cases that had occurred within 5 years of the NFI field  
175 measurement date (according to the estimate of the field team) were considered.

176 Two different types of statistical modelling methods were used: generalized linear models  
177 (GLM) and generalized additive models (GAM), both with a logistic link function. GAM is an  
178 extension of a GLM where the linear predictor contains a sum of smooth functions of  
179 continuous predictors. Using smooth functions instead of detailed parametric relationships (as  
180 done in GLMS) allows for more flexibility in the dependence of the response of the predictors  
181 [24].

182 The model selection was done using only the GLM model. The model predictors were chosen  
183 based on (1) existing understanding of snow damage dynamics, (2) availability of national  
184 extent GIS-data to be used for map prediction, (3) statistical significance of highest order terms  
185 in model, requiring significance on the level of  $p < 0.01$ , as the large sample size easily leads  
186 to small p-values, (4) improvement in AIC when comparing alternative models and (5)  
187 collinearity between predictors, determined by the generalized variation inflation factor (GVIF).  
188 If the GVIF exceeded 4 for any of the predictor variables, one of the correlated variables was  
189 left out of the model. The decision on which variable to exclude was made following the same  
190 five steps of comparing alternative models. For continuous variables with non-negative values,  
191 log-transformations with natural logarithm were tested and included where they led to a lower  
192 AIC. For transparency of the model selection process, intermediate model versions with  
193 variables not included in the final model can be found in the supplementary material (S1).

194 The potential predictor variables considered in the model selection were grouped into abiotic  
195 variables relating to snow load and topography (ABIOTIC) and forest variables (FOREST).  
196 The ABIOTIC variable group contained variables describing crown snow load (maximum of  
197 previous 5 years), long term average of winter maximum crown snow load, altitude from sea  
198 level, relative elevation in comparison to a kilometer radius and a variable describing if the plot  
199 was located in the north boreal vegetation zone, according to the biogeographical zones data  
200 from the Finnish Environment Institute [25]. The FOREST variable group included dominant



201 tree species of the stand, average DBH of the stand, average tree height of the stand, basal  
202 area, forest management history, site type (poor vs fertile, using the same classification as in  
203 Suvanto et al. 2019), number of tree species, proportion of basal area by the most abundant  
204 species and the Shannon diversity index, calculated from the proportions of basal area by  
205 each species. For forest management history, three variables were included - all thinnings,  
206 pre-commercial thinnings and tending of seedling stands. All were included as  
207 presence/absence variables that described if the management operation had been carried out  
208 at the stand more than 5 years ago. Management information within five years from the NFI  
209 measurement was not considered because, if snow damage had occurred in the stand, it  
210 would not be clear if the management was done before or after damage (damage was  
211 considered from the latest 5 years). To find potential species specific responses, interaction  
212 terms were tested between tree species and DBH, basal area, the snow load variables and  
213 the north boreal zone variable.

214 After the predictors were selected for the model, two additional submodels were formed to  
215 have three models: a full model with all predictors (FULL), a model with only abiotic predictors  
216 (ABI=C) and a model with only predictors related to forest properties (FOREST) (see  
217 variables included in each group in the final model in Table 3, results for the variables not  
218 included in the final model can be found in S1). In case of an interaction between variables in  
219 different variables groups, both variables were included in the FOREST group.

220 Models with the same predictor variables were then fitted as generalized additive models  
221 (GAM) to test if using a non-parametric model would lead to better outcome, as they are able  
222 to effectively deal with non-linear relationships. Continuous predictor variables were included  
223 in the GAM models as smoothing spline functions. The dimension parameter (k), that sets the  
224 upper limit on the degrees of freedom related to the smooth, was set to 15 for all variables.  
225 The suitability of the k parameter was assessed visually. In addition, the effective degrees of  
226 freedom after fitting the model were lower than k for all of the terms, suggesting that the chosen  
227 k values were sufficiently large.

228 The performance of the models was assessed with 10-fold stratified cross-validation, where  
229 the number of damaged plots was divided evenly into the folds. One fold at the time was used  
230 as test data while the model was fitted with the remaining nine folds. Receiver operating  
231 characteristic (ROC) and area under curve (AUC) were calculated for the test data to assess  
232 the model performance. AUC value of 0.5 corresponds to a situation where the model does  
233 not do better than randomly assigning the prediction values whereas AUC value of 1 would  
234 mean that the model is perfectly able to discriminate between damage cases and no-damage  
235 cases. As a rule of thumb, 0.7 is often used as an acceptable level of discrimination between  
236 the classes [26].

237 To compare the results for typical snow load winters and an exceptionally high snow load  
238 winter, AUC values for the cross-validation were calculated in three different subsets: using  
239 all the data in the test data fold, using only data from 2005-2017 in the test data fold (“typical  
240 snow load winters”) and using only data from the 2017-2018 winter (“exceptional snow load  
241 winter”, Fig. 1). These subsets were only used in the test data fold, all data in the remaining  
242 folds were used to fit the model in each cross-validation round.

243

244 **Figure 1. Percentage of plots with snow damage in each year (A; year refers to the**  
245 **year the NFI plot has been measured on the field, damage may have occurred within**  
246 **previous five years) and (B) maximum snow load at the NFI plots within a five year**  
247 **time window.**

248

249 Statistical modelling was done in R version 3.5.2., ROC and AUC were calculated with the R  
250 package *pROC* [27]. The GAMs were fitted using the R package *mgcv* [24].

## 251 Mapping of damage probability

252 The snow damage probability map was calculated for the whole country of Finland in 16 x 16  
253 m pixel resolution, by using the full GLM and GAM models and geographic information system  
254 (GIS) datasets representing the predictors of models.

255 Regarding GIS datasets, multi-source forest inventory (MS-NFI) forest resource maps for 2017  
256 [28] were used for the forest variables (tree species, DBH, basal area). Topographic variables  
257 (altitude and relative elevation) were derived from the 25 meter resolution DEM of the National  
258 Land Survey of Finland and **resampled** to the same **16 m x 16 m grid**. Snow load data [15] for  
259 winter 2017-2018 was used in the calculation of the map, as this winter was also used for the  
260 testing of the map

261 The processing of GIS data was conducted using R (package raster), Python and GDAL. The  
262 calculation of the map was done using R package raster [29] and the sp package [30].

## 263 Testing the map

264 The test data for the damage risk maps for winter 2017-2018 was obtained from the Finnish  
265 Forest Centre.

266 For damage events, forest use declarations where snow damage had been recorded were  
267 extracted from the data, using the reports sent to the Forest Centre from December 1st 2017  
268 to September 30th 2018. Forest owners are required by law to submit a forest use declaration  
269 to the Forest Centre before conducting forest management operations at their stands and  
270 since 2012 these declarations have included information about **forest damage** in the stand in  
271 case the damage has been the reason for the logging operation. The declarations contain  
272 information about the stand, including the occurred damage, and a spatially referenced  
273 polygon outlining the stand. The final test data contained a total of 11 807 snow damaged  
274 stands (referred to as “snow damage polygons” from now on).

275 To compare the snow damage polygons from forest use declarations to non-damaged stands,  
276 we used another data set by the Forest Centre, which contains spatial polygons and basic  
277 forest property information for forests on private lands in Finland. From this data, one percent  
278 of the polygons in the whole country was randomly sampled. Polygons classified as open  
279 stands (i.e., did not have trees) were excluded from the sample. **While this data set does not**  
280 **contain information about forest damage, we assume that these stands are not damaged.** The  
281 resulting data consisted of 101 073 polygons (referred as “non-damaged polygons” from now  
282 on).

283 To test if the map was able to differentiate between damaged and non-damaged stands within  
284 the larger damage area (as compared to only differentiating the general damage area from  
285 the rest of the country), another test was carried out by only including the non-damaged  
286 polygons that were located within 10 kilometers from the damaged stands (Fig. 5). **This subset**  
287 **contains 16 486 non-damaged polygons.**

288 For both snow damage polygons and non-damaged polygons the average value of snow  
289 damage map pixels within each polygon was calculated for both maps based on GLM and  
290 GAM models. Then, the distribution of the map values was examined on the snow damaged  
291 and non-damaged maps, and ROC curves and AUC values were calculated to assess the  
292 performance of the maps to identify the snow damage cases.

293 Both of the used data sets (forest use declarations and stand polygons for private lands) are  
294 published by the Finnish Forest Centre under CC BY 4.0 licence and are openly available  
295 (<https://www.metsaan.fi/paikkatietoaineistot>). Data were **loaded** in October 2020.

## 296 Results

297 Both GLM model results show that abiotic factors, especially crown snow load, drive the snow  
298 damage, as damage probability increases with increasing snow load, relative elevation and  
299 altitude (Table 3, Fig. 2). Yet, forest characteristics also have an impact on damage

300 occurrence. Damage probability was higher in stands with higher basal area and in stands  
 301 with lower average DBH. The model showed higher damage probabilities in stands dominated  
 302 by pine compared to other species. Norway spruce dominated stands show regional different  
 303 patterns, with disturbance probability being significantly lower in the north boreal zone  
 304 compared to other parts of the country. For species group “other”, mainly consisting of birches,  
 305 higher values of damage probability were predicted for small DBH stands compared to pine  
 306 and spruce (Fig. 2).

307

308 **Figure 2. The impact of predictors for the probability of snow damage occurrence**  
 309 **according to the full GLM model.** Note different y-axis limits in abiotic variables (upper  
 310 row) and the forest variables (lower row). The rug showing the distribution of data points is a  
 311 random subset of 10 000 plots from the original data.

312 **Table 3.** Model results for the full GLM model

|                             | Estimate | Std. Error | z value | Pr(> z ) |
|-----------------------------|----------|------------|---------|----------|
| Intercept                   | -7.209   | 0.168      | -42.975 | < 0.001  |
| SpeciesSpruce <sup>1)</sup> | -0.287   | 0.058      | -4.952  | < 0.001  |
| SpeciesOther <sup>1)</sup>  | 0.716    | 0.214      | 3.350   | < 0.001  |
| DBH                         | -0.072   | 0.004      | -16.308 | < 0.001  |
| log(Basalarea + 0.5)        | 1.101    | 0.048      | 22.721  | < 0.001  |
| NorthBoreal                 | -0.031   | 0.069      | -0.450  | < 0.001  |
| SnowloadLongterm            | -0.027   | 0.005      | -6.093  | < 0.001  |
| Snowload                    | 0.032    | 0.001      | 30.822  | < 0.001  |
| RelativeElevation           | 0.026    | 0.002      | 10.752  | < 0.001  |
| Altitude                    | 0.006    | 4.7E-04    | 11.892  | < 0.001  |

|                             |        |       |        |         |
|-----------------------------|--------|-------|--------|---------|
| SpeciesOther x DBH          | -0.092 | 0.016 | -5.670 | < 0.001 |
| SpeciesSpruce x NorthBoreal | -0.749 | 0.186 | -4.029 | < 0.001 |

---

313 <sup>1)</sup> Compared to the reference species Scots pine

314

315 GAM models showed generally similar patterns as GLM models but also revealed non-  
316 linearities not visible in the GLM results. For example, probability of damage only started to  
317 rise drastically with snow load after 75 kg m<sup>-2</sup> (Fig. 3), which is clearly higher than the snow  
318 loads observed in typical winter conditions (Fig. 1B). The GAM results also show decrease of  
319 damage probability with relative elevation and altitude after a certain thresholds, but as there  
320 are few observations at high values of both of these variables, there is high uncertainty of the  
321 shape of the spline. Long term snow load (15 years average) also showed a nonlinear trend  
322 with the damage probability, with damage probability values peaking at 30 kg m<sup>-2</sup>.

323

324 **Figure 3. Effects plots for predictors in the full GAM model.** Note different y-axis limits in  
325 abiotic variables (upper row) and the forest variables (lower row). The rug showing the  
326 distribution of data points is a random subset of 10 000 plots from the original data.

327

328 The forest management variables (thinnings, precommercial thinning and tending of seedling  
329 stands) were not included in the final model as the p-values of the coefficients were larger  
330 than the defined  $p < 0.001$  level. For tending of seedling stands the p-values were rather close  
331 to this level ( $p = 0.0018$ ), but the variable was nevertheless excluded for not meeting the set  
332 criteria and also for the difficulty of attaining relevant GIS data (results in supplementary  
333 material S1). Similarly, the species composition variables were excluded from the model, with  
334 results for Shannon diversity index being closest for being included ( $p = 0.0041$ ) showing  
335 negative effect on damage probability (S1).

336 The cross-validation of the models showed that the FULL model with both abiotic and forest  
337 variables included performed better than the submodels with variables from only one group  
338 included (models ABIOTIC and FOREST, Fig. 4). There was a difference between cross-  
339 validation results of winters with typical snow load conditions (2005-2017) and the 2017-2018  
340 winter with exceptionally high snow loads. In the 2017-2018 winter the AUC values were also  
341 notably higher than in the results with full data or only years 2005-2017 and the ABIOTIC  
342 model with only abiotic predictors performed nearly as well as the full model (Fig. 4). In the  
343 cross-validation, the GLM and GAM models gave rather similar results. In general, GAM  
344 seemed to perform better for the ABIOTIC model and GLM for the FOREST model (Fig. 4).

345

346 **Figure 4. Cross-validation results for GLM and GAM with different predictor sets and**  
347 **for different time periods.** Dash line shows the AUC=0.7 threshold for acceptable level of  
348 discrimination between cases and non-cases.

349

350 The snow damage probability maps predicted the highest snow damage risks in 2017-2018  
351 near eastern border of the country (Fig. 5). The overall patterns in GLM and GAM maps were  
352 similar, with only minor differences. Testing the map with snow damage polygons showed that  
353 the model is able to predict damage probability on acceptable level also when GIS data is  
354 used for prediction instead of the field-measured NFI data (Fig. 6). Very high AUC values were  
355 obtained when the non-damage polygons were randomly sampled from the whole country  
356 (Fig. 6a) but also the test with non-damaged polygons sampled only from proximity of  
357 damaged polygons showed good ability of the model to identify the snow damaged polygons  
358 (Fig. 6b). The test showed quite similar results for the two modelling methods, though the map  
359 produced with the GAM model gained slightly better results (Fig. 6).

360

361 **Figure 5. The Forest Centre data used for testing the snow damage probability maps,**  
362 **and the snow damage probability maps calculated with the snow load data from**  
363 **winter 2017-2018, using the full GLM and GAM models.**

364

365 **Figure 6. ROC curves and AUC values for the test of the snow damage probability**  
366 **map with the Forest Centre data: using non-damaged polygons from the whole**  
367 **country (A) and only considering non-damaged polygons within 10 km distance from**  
368 **snow damaged polygons (B).**

## 369 Discussion

370 We quantified the role of critical meteorological conditions to the snow damage risks by  
371 combining estimates of crown snow loads to the actual measurements of forest properties and  
372 snow damage from a large area in the boreal zone. The results showed that snow load  
373 becomes the dominating driver of damage during heavy snow years, but forest properties still  
374 improve the prediction of damage. During regular winters with typical snow packs, forest  
375 properties identify risk locations better than snow load and topographical information alone.  
376 Further, we demonstrated that the damage locations can be reliably pinpointed on heavy snow  
377 years at high resolution, which can be used to facilitate salvage logging and conservation  
378 planning. Moreover, the snow damage risk model can be applied with data of long-term snow  
379 load return-rates or projections of future snow loads, to generate risk estimates for ~~the~~ forest  
380 development scenarios under climate change.

381 The best predictions of snow damage probability were obtained when both abiotic variables  
382 (long term and recent snow load and topographic variables) and forest characteristics (species  
383 including an interaction with location in north boreal zone, DBH, basal area) were included in  
384 the model. By combining forest related predictors with snow load information from the winters  
385 preceding the NFI observations, our work extends further from many previous snow damage



386 studies focusing solely on forest and site characteristics [31, 2, 5]. While studies focusing on  
387 single snow damage events have been able to include both forest and snow information before  
388 [6], this is not the case for studies using long-term data from several damage events. In  
389 addition, the data describing snow load in the tree crown [15], used in our analysis, provides  
390 a more realistic presentation of damage conditions compared to using information about snow  
391 depth, as used by, for example, Hlásny et al. [6]. On the other hand, our work offers potential  
392 improvements to meteorological estimations of snow load that assume a constant shape of  
393 tree crown in the calculation of snow load [11, 15], by incorporating detailed information about  
394 forest properties. This opens new possibilities for practical application possibilities, as  
395 increased accuracy in snow damage probability calculations can be attained when combining  
396 high-resolution forest data to the estimates formerly based only on simplified assumptions of  
397 the tree properties.

398 The exceptionally heavy snow load winter showed distinctively different patterns in our results  
399 compared to winters with lower snow load levels, as the model performed clearly better for the  
400 heavy snow load winter and the abiotic variables alone contributed for most of the model  
401 performance. This suggests that the processes of snow damage between heavy snow load  
402 winters and typical winter conditions have dissimilarities. It seems that during winters with low  
403 or moderate snow loads, snow disturbances only occur in the most vulnerable forests,  
404 emphasizing the importance of the forest predictors in these conditions. On the other hand, in  
405 winters with exceptionally high snow loads, damage can occur also on forests not as sensitive  
406 to snow damage, which is reflected in our results by the increased importance of the abiotic  
407 predictors. With lower snow loads forest properties drive the snow damage probability while  
408 their relative role diminishes when snow loads rise to exceptionally high levels. This  
409 interpretation is further supported by the effect of snow load in our results starting to strongly  
410 increase only after approx.  $75 \text{ kg m}^{-2}$ , a level of crown snow load only rarely occurring in typical  
411 winter conditions (Fig. 1B). Uncertainties related to snow load data as well as the NFI damage  
412 observations may, at least partially, also play a role in the difference between typical and

413 extreme snow load years. During a heavy snow load winter, the snow damage in forest is likely  
414 to be clearer and less likely by the NFI field team to be mistaken for wind damage.  
415 Meteorological estimation of snow loads may also be less uncertain when the snow loads are  
416 high.

417 The effects of abiotic and forest factors on snow damage probability in our final model were  
418 largely in line with the previous research. Increasing damage probability with elevation from  
419 sea level and with relative elevation from the surrounding terrain are backed by previous  
420 results [8, 15, 32]. In accordance with literature a review by Nykänen [8], damage probability  
421 in our results increased with basal area and decreased with stand average DBH. In our results,  
422 the effect of DBH was different for stands not dominated by pine or spruce (i.e., mainly birch  
423 dominated). Our results supported earlier research showing higher susceptibility to damage in  
424 conifers versus deciduous trees and in Scots pine compared to Norway spruce [2, 8, 33].

425 Our results reveal patterns suggesting adaptation of forests to high snow loads. First, in  
426 addition to the differences in damage probability between species, our results revealed  
427 geographical differences within Norway spruce, with spruce stands in the north boreal zone  
428 showing reduced probability of damage compared to spruce stands in the other parts of the  
429 country. The spruce trees in high latitude and altitude areas are known to have different crown  
430 morphology, with narrow crown shape reducing the accumulation of snow load on trees [19,  
431 20]. Our results show in practise how the morphological variation in the species leads to  
432 geographical variation in the predisposition of the trees to snow damage. Second, the negative  
433 effect of long-term snow load on the damage probability in the model suggests that forests in  
434 areas with historically higher snow loads are more resistant against snow damage. This effect  
435 was not species-specific but instead seems to affect stands regardless of the dominant  
436 species, as the interaction between long-term snow load and species was not statistically  
437 significant (S1). While the morphological differences may play a role also here, differences in  
438 forest structure in areas with high snow loads may also contribute in explaining this result, if

439 the basal area and DBH included in the model are not sufficiently accounting for stand

440 **structure**

441 We did not find a statistically significant connection between thinnings and damage probability  
442 (results in S1). This finding contradicts previous research. According to literature review by  
443 Nykänen et al. [8] trees in unthinned stands are more susceptible to snow damage and  
444 delayed thinning increases the snow damage risk. On the other hand, thinnings are found to  
445 temporarily increase the susceptibility of trees to snow damage, leading to higher damage  
446 risks during the first and second years after thinning [8, 33] and Wallentin and Nilsson [34]  
447 found snow damage to be positively correlated with thinning intensity. We would not conclude  
448 from our results that forest management does not affect snow damage probability, instead the  
449 non-significance of the management effect is likely to be related to the insufficient detail of the  
450 used data. The main weakness in our analysis in regard to forest management is the imprecise  
451 definition of time between the damage and the management operation. As damage in our  
452 analysis had occurred within a time-window of five years before the NFI measurement,  
453 management operations could only be included if they had occurred more than five years ago.  
454 Otherwise it would not have been possible to differentiate between thinnings before the  
455 damage from ones occurring only after the damage. However, with this approach we are likely  
456 to lose the most sensitive period of one to two years after the thinning, when the damage  
457 sensitivity is the highest [8, 33]. It is also worth noting that the forest variables included in the  
458 model (DBH and basal area) are strongly affected by management and, therefore, the effects  
459 of management are not completely excluded from the model.

460 Many previous studies have analyzed snow and wind damage together [31, 35-37] as these  
461 two processes can act jointly in a damage event. For example, wind can more easily break  
462 trees with heavy snow load, or strong winds can either increase the snow accumulation or  
463 prevent the accumulation of snow on trees by shedding the snow from the branches [8, 14].  
464 However, while these processes can be related to each other, our results here and the  
465 previous results for wind damage [13] show that snow damage and wind damage affect

466 different types of forest stands and have also spatially different occurrence patterns. While  
467 wind damage risk increases with tree height [13], snow damage is more typical in smaller  
468 trees, as shown in our results. In addition, snow damage can also occur with a minimal effect  
469 of wind (as in [6]) and wind disturbances often are not accompanied by snowfall.

470 The challenge in considering wind and snow separately in NFI data is in reliably identifying  
471 the cause of the damage in the field when field measurements are not targeting any specific  
472 damage event and stem breakages and uprooting can be related to either of the damage  
473 causes or their combined effects [31]. For example, in southern Finland where heavy snow  
474 events are less common, snow damage may be mistakenly classified as wind damage, as  
475 those are more common in the region. The damage may have occurred already several years  
476 before the field measurement, making the correct identification of damage cause even harder.  
477 This adds uncertainty in the analysis and may also partly contribute to our results on why the  
478 model did not perform as well for the winters without heavy snow loads. Yet, while this  
479 uncertainty needs to be acknowledged we argue that, due to the differences in the two  
480 disturbance processes, it is beneficial to study damage caused by wind and by snow  
481 separately, whenever the used data makes this possible.

482 In our analysis, we did not differentiate between different snow damage types and, even  
483 though the ~~used~~ NFI data did contain some information on the damage type (see Table 1),  
484 stem breakage and uprooting were pooled in the same class, thus preventing us from  
485 analyzing them separately. This is a potential shortcoming of our analysis, as different **damage**  
486 **dynamics** may be behind stem breakage versus uprooting [6, 16, 37].

487 Logistic regression models (GLM) have long been the traditional method for modelling snow  
488 and other forest disturbances [31, 35-37] whereas GAM provides more flexibility in modelling  
489 non-linear responses, as the relationship between continuous predictors and the response  
490 variable can be modelled with smoothing spline functions instead of the linear relationships  
491 [24]. In our results, the comparison of the two statistical modelling methods showed rather  
492 similar results for the full model despite the method used. The GAM model performed better

493 for the ABIOTIC model and the GLM for the FOREST model. This difference is likely to explain  
494 the better performance of the map based on the GAM model for the test data from winter 2017-  
495 2018, since this was a high snow load winter where the abiotic factors drove the damage  
496 probability. While the flexible spline functions in GAM increased the model performance in the  
497 case of the abiotic predictors, the traditionally used parametric models have some additional  
498 benefits in modelling forest disturbances, such as the ease of implementation of models in  
499 new applications and more straightforward interpretation of the models [13].

## 500 **Conclusions**

501 In this study, we demonstrated the applicability of the damage probability mapping approach  
502 for snow disturbances, using NFI data in combination with GIS data layers, and tested the  
503 performance of the resulting map. The developed statistical model can be used to assess  
504 snow damage probability of forests, either in specific snow damage events by using observed  
505 snow load data or more generally by using data of long-term snow load return-rates or  
506 projections of future snow loads

507 Models with forest variables together with abiotic variables, including snow load, were found  
508 to perform better than models with predictors from only one of these variable groups. This was  
509 true especially for winters with typical snow load conditions, whereas the role of abiotic  
510 variables was emphasized in the heavy snow load winter. These results encourage combining  
511 snow load data with local and up-to date forest information, as increased accuracy in snow  
512 damage probability calculations can be attained when combining high-resolution forest data  
513 to the estimates formerly based only on simplified assumptions of the tree properties.

## 514 **Acknowledgements**

515 The research was funded from the project SÄÄTYÖ funded by the Ministry of Agriculture and  
516 Forestry of Finland. This project has received funding from the European Union's Horizon

517 2020 research and innovation programme under the Marie Skłodowska-Curie grant  
518 agreement No 895158. We would like to thank the National Forest Inventory group in Luke for  
519 the NFI data we were able to use in the study. We acknowledge CSC – IT Center for Science,  
520 Finland, for computational resources.

## 521 References

- 522 1. Valinger, E., Fridman, J., 1997. Modelling probability of snow and wind damage in  
523 Scots pine stands using tree characteristics. *For. Ecol. Manag.* 97, 215–222.  
524 [https://doi.org/10.1016/S0378-1127\(97\)00062-5](https://doi.org/10.1016/S0378-1127(97)00062-5)
- 525 2. Jalkanen, A., Mattila, U., 2000. Logistic regression models for wind and snow  
526 damage in northern Finland based on the National Forest Inventory data. *For. Ecol.*  
527 *Manag.* 135, 315–330.
- 528 3. Díaz-Yáñez, O., Mola-Yudego, B., Eriksen, R., González-Olabarria, J.R., 2016.  
529 Assessment of the Main Natural Disturbances on Norwegian Forest Based on 20  
530 Years of National Inventory. *PLOS ONE* 11, e0161361.  
531 <https://doi.org/10.1371/journal.pone.0161361>
- 532 4. Duperat, M., Gardiner, B., Ruel, J.-C., 2020. Wind and snow loading of balsam fir  
533 during a Canadian winter: a pioneer study. *Forests* 11, 1089. doi:10.3390/f11101089
- 534 5. Klopčič, M., Poljanec, A., Gartner, A., Boncina, A., 2009. Factors related to natural  
535 disturbances in mountain Norway spruce (*Picea abies*) forests in the Julian Alps.  
536 *Écoscience* 16, 48–57. <https://doi.org/10.2980/16-1-3181>
- 537 6. Hlásny, T., Křístek, Š., Holuša, J., Trombik, J., Urbaňcová, N., 2011. Snow  
538 disturbances in secondary Norway spruce forests in Central Europe: Regression  
539 modeling and its implications for forest management. *For. Ecol. Manag.* 262, 2151–  
540 2161. <https://doi.org/10.1016/j.foreco.2011.08.005>
- 541 7. Nagel, T.A., Mikac, S., Dolinar, M., Klopčič, M., Keren, S., Svoboda, M., et al., 2017.  
542 The natural disturbance regime in forests of the Dinaric Mountains: A synthesis of

- 543 evidence. *For. Ecol. Manag.*, 388, 29–42.  
544 <https://doi.org/10.1016/j.foreco.2016.07.047>
- 545 8. Nykänen, M.-L., Peltola, H., Quine, C., Kellomäki, S., Broadgate, M., 1997. Factors  
546 affecting snow damage of trees with particular reference to European conditions.  
547 *Silva Fenn.* 31, 193–213.
- 548 9. Schelhaas, M.-J., Nabuurs, G.-J., Schuck, A., 2003. Natural disturbances in the  
549 European forests in the 19th and 20th centuries. *Glob. Change Biol.* 9, 1620–1633.  
550 <https://doi.org/10.1046/j.1365-2486.2003.00684.x>
- 551 10. Seidl, R., Thom, D., Kautz, M., Martin-Benito, D., Peltoniemi, M., Vacchiano, G., et al.  
552 2017. Forest disturbances under climate change. *Nat. Clim. Change* 7, 395–402.  
553 <https://doi.org/10.1038/nclimate3303>
- 554 11. Lehtonen, I., Kämäräinen, M., Gregow, H., Venäläinen, A., Peltola, H., 2016. Heavy  
555 snow loads in Finnish forests respond regionally asymmetrically to projected climate  
556 change. *Nat. Hazards Earth Syst. Sci.* 16, 2259–2271. [https://doi.org/10.5194/nhess-](https://doi.org/10.5194/nhess-16-2259-2016)  
557 [16-2259-2016](https://doi.org/10.5194/nhess-16-2259-2016)
- 558 12. Venäläinen, A., Lehtonen, I., Laapas, M., Ruosteenoja, K., Tikkanen, O.-P., Viiri, H.,  
559 et al., 2020. Climate change induces multiple risks to boreal forests and forestry in  
560 Finland: A literature review. *Glob. Change Biol.* 26, 4178–4196.  
561 <https://doi.org/10.1111/gcb.15183>
- 562 13. Suvanto, S., Peltoniemi, M., Tuominen, S., Strandström, M., Lehtonen, A., 2019.  
563 High-resolution mapping of forest vulnerability to wind for disturbance-aware forestry.  
564 *For. Ecol. Manag.* 453, 117619. <https://doi.org/10.1016/j.foreco.2019.117619>
- 565 14. Solantie, R., 1994. Effect of weather and climatological background on snow damage  
566 of forests in Southern Finland in November 1991. *Silva Fenn.* 28.  
567 <https://doi.org/10.14214/sf.a9173>
- 568 15. Lehtonen, I., Hoppula, P., Pirinen, P., Gregow, H., 2014. Modelling crown snow loads  
569 in Finland: a comparison of two methods. *Silva Fenn.* 48.  
570 <https://doi.org/10.14214/sf.1120>

- 571 16. Peltola, H., Kellomäki, S., Väisänen, H., Ikonen, V.-P., 1999. A mechanistic model for  
572 assessing the risk of wind and snow damage to single trees and stands of Scots  
573 pine, Norway spruce, and birch. *Can. J. For. Res.* 29, 647–661.  
574 <https://doi.org/10.1139/x99-029>
- 575 17. Jalkanen, R., Konopka, B., 1998. Snow-packing as a potential harmful factor on  
576 *Picea abies*, *Pinus sylvestris* and *Betula pubescens* at high altitude in northern  
577 Finland. *Eur. J. For. Pathol.* 28, 373–382.
- 578 18. Mikola, P., 1938. Kuusen latvus- ja runkumuodosta Maanselän lumituhoalueella (In  
579 Finnish, summary in German: Über die Kronen- und Schaffform der Fichte im  
580 Schneeschadengebiet von Maanselkä Ost-Finnland), *Silva Fennica*. Suomen  
581 Metsätieteellinen Seura.
- 582 19. Morgenstern, K.E. *Geographic Variation in Forest Trees: Genetic Basis and*  
583 *Application of Knowledge in Silviculture*; Chow, F.E., Ed.; UBC Press: Vancouver,  
584 BC, Canada; University of British Columbia: Vancouver, BC, Canada, 1996; ISBN 0-  
585 7748-0560-9.
- 586 20. Geburek, T., Robitschek, K., Milasowszky, N., 2008. A tree of many faces: Why are  
587 there different crown types in Norway spruce (*Picea abies* [L.] Karst.)? *Flora -*  
588 *Morphol. Distrib. Funct. Ecol. Plants* 203, 126–133.  
589 <https://doi.org/10.1016/j.flora.2007.01.003>
- 590 21. Korhonen, K.T., 2016. National forest inventories: assessment of wood availability  
591 and use: Finland. In: Vidal, C., Alberdi, I., Hernández, L., Redmond, J.J. (Eds.),  
592 *National Forest Inventories: Assessment of Wood Availability and Use*. Springer  
593 International Publishing, Switzerland, pp. 369–384.
- 594 22. Korhonen, K.T., Ihalainen, A., Ahola, A., Heikkinen, J., Henttonen, H.M., Hotanen, J.-  
595 P., et al., 2017. Suomen metsät 2009–2013 ja niiden kehitys 1921–2013 (No.  
596 59/2017), Luonnonvara- ja biotalouden tutkimus. Natural Resources Institute Finland  
597 (Luke).
- 598 23. Hoffmann, L., Günther, G., Li, D., Stein, O., Wu, X., Griessbach, S., et al., 2019.



- 599 From ERA-Interim to ERA5: the considerable impact of ECMWF's next-generation  
600 reanalysis on Lagrangian transport simulations. *Atmospheric Chem. Phys.* 19, 3097–  
601 3124. <https://doi.org/10.5194/acp-19-3097-2019>
- 602 24. Wood, S., 2017. *Generalized Additive Models: An Introduction with R*, Second  
603 Edition, 2nd edition.
- 604 25. SYKE 2015, Metsäkasvillisuusvyöhykkeet (National biogeographical regions).  
605 [https://ckan.ymparisto.fi/dataset/%7B664BE696-C6A5-4FC4-8D6A-  
606 7D2E63D0E9C6%7D](https://ckan.ymparisto.fi/dataset/%7B664BE696-C6A5-4FC4-8D6A-7D2E63D0E9C6%7D)
- 607 26. Hosmer, D.W., Lemeshow, S., Strudivant, R.X., 2013. *Applied Logistic Regression*,  
608 3rd ed. John Wiley & Sons, New York.
- 609 27. [Robin, X., Turck, N., Hainard, A., Tiberti, N., Lisacek, F., Sanchez, J.-C., et al., 2011.](#)  
610 [pROC: an open-source package for R and S+ to analyze and compare ROC curves.](#)  
611 [BMC Bioinformatics 12, 77. https://doi.org/10.1186/1471-2105-12-77](#)
- 612 28. Mäkisara, K., Katila, M., Peräsaari, J., 2019. The Multi-Source National Forest  
613 Inventory of Finland - methods and results 2015 (No. 8/2019), Natural Resources  
614 and Bioeconomy Studies. Natural Resources Institute Finland (Luke).
- 615 29. Hijmans, R.J., 2017. raster: Geographic Data Analysis and Modeling. R package  
616 version 2.6-7. <https://CRAN.R-project.org/package=raster>.
- 617 30. Pebesma, E.J., Bivand, R.S., 2005. Classes and methods for spatial data in R (No. 5  
618 (2), <https://cran.r-project.org/doc/Rnews/>), R News.
- 619 31. Valinger, E., Fridman, J., 1999. Models to Assess the Risk of Snow and Wind  
620 Damage in Pine, Spruce, and Birch Forests in Sweden. *Environ. Manage.* 24, 209–  
621 217.
- 622 32. Makkonen, L., Ahti, K., 1995. Climatic mapping of ice loads based on airport weather  
623 observations. *Atmospheric Res., Atmospheric icings of structures* 36, 185–193.  
624 [https://doi.org/10.1016/0169-8095\(94\)00034-B](https://doi.org/10.1016/0169-8095(94)00034-B)
- 625 33. Suominen, O., 1963. Metsiköiden alttius lumituhoon. Tutkimus Etelä-Suomessa  
626 talvella 1958-59 sattuneesta lumituhosta. (In Finnish, summary in English:

- 627 Susceptibility of stands to devastation by snow. Investigation into snow devastation in  
628 South Finland in winter 1958-59) (No. 112), *Silva Fenn.*
- 629 34. Wallentin, C., Nilsson, U. 2014. Storm and snow damage in a Norway spruce  
630 thinning experiment in southern Sweden. *Forestry* 87 (2), 229-238.
- 631 35. Suvanto, S., Henttonen, H.M., Nöjd, P., Mäkinen, H., 2016. Forest susceptibility to  
632 storm damage is affected by similar factors regardless of storm type: Comparison of  
633 thunder storms and autumn extra-tropical cyclones in Finland. *For. Ecol. Manag.* 381,  
634 17–28. <https://doi.org/10.1016/j.foreco.2016.09.005>
- 635 36. Díaz-Yáñez, O., Mola-Yudego, B., González-Olabarria, J.R., 2019. Modelling  
636 damage occurrence by snow and wind in forest ecosystems. *Ecol. Model.* 408,  
637 108741. <https://doi.org/10.1016/j.ecolmodel.2019.108741>
- 638 37. Zhu, J., Li, X., Liu, Z., Cao, W., Gonda, Y., Matsuzaki, T., 2006. Factors affecting the  
639 snow and wind induced damage of a montane secondary forest in northeastern  
640 China. *Silva Fenn.* 40. <https://doi.org/10.14214/sf.351>

641

## 642 Supporting material

643 **S1.** Details of model selection

Figure 1

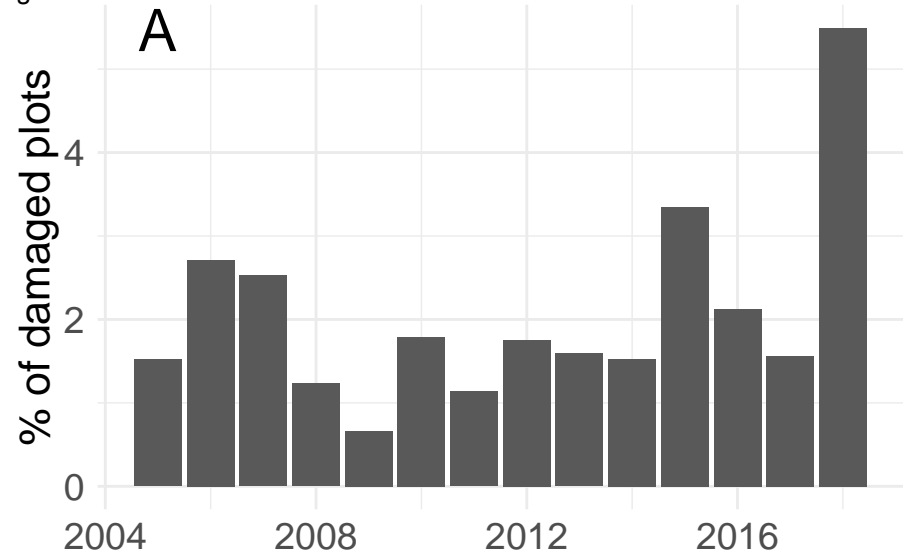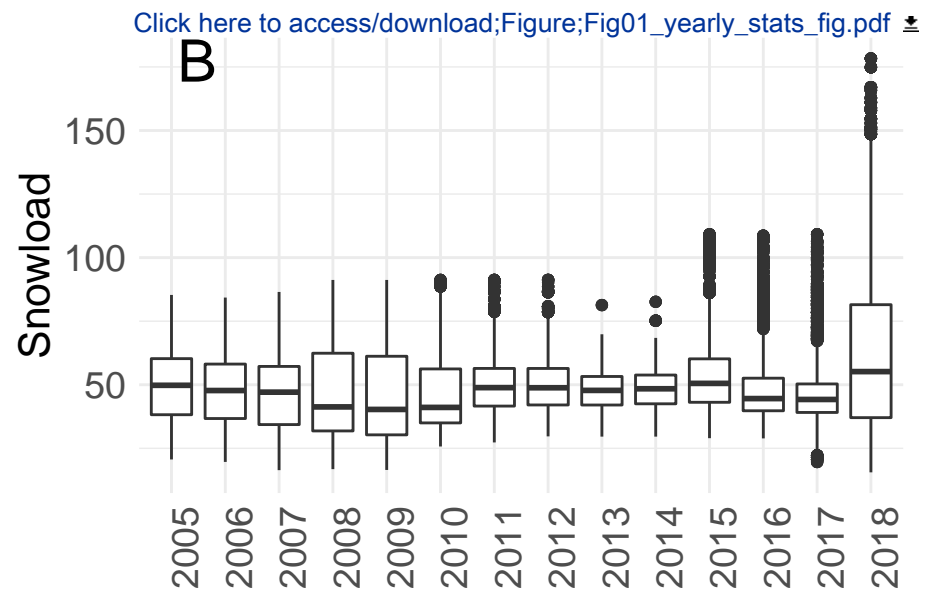

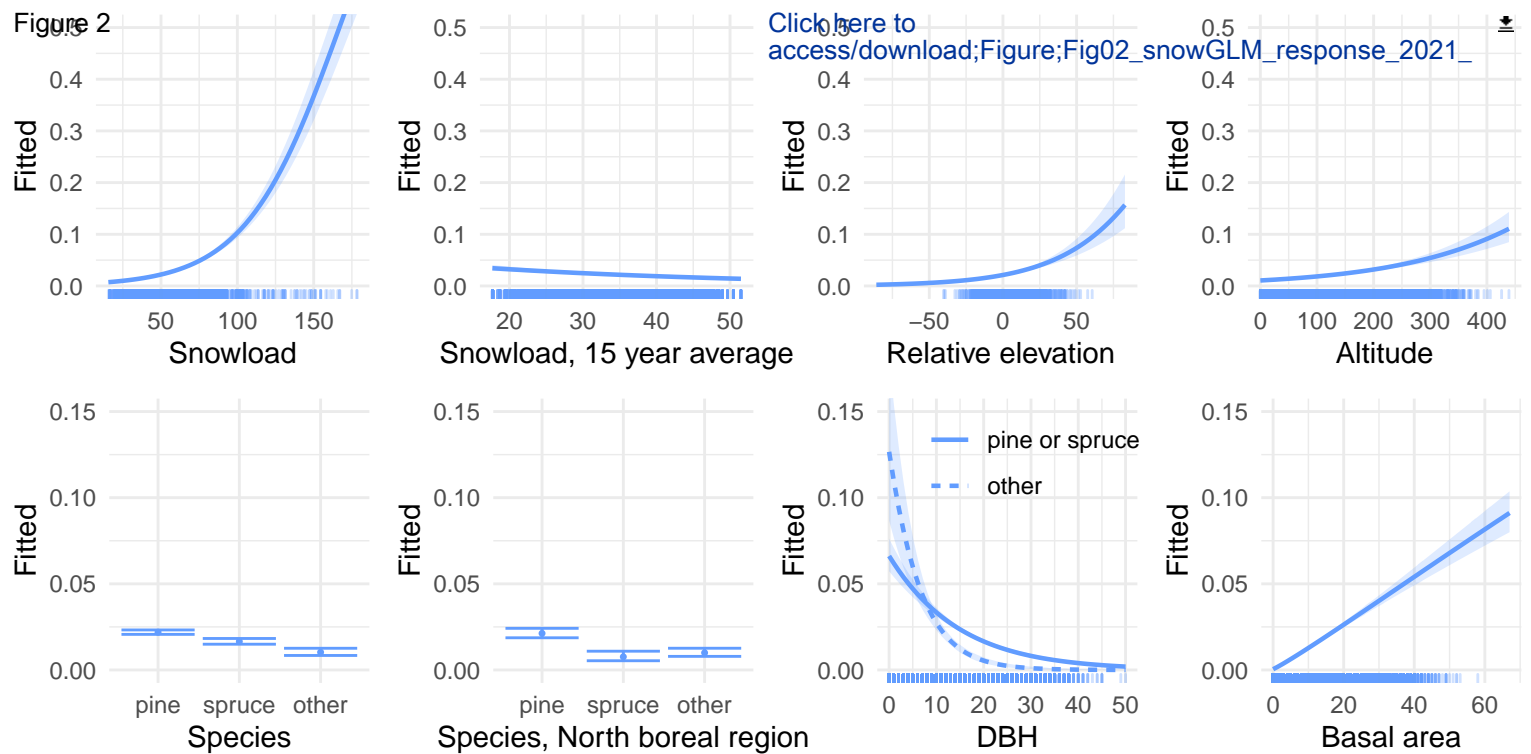

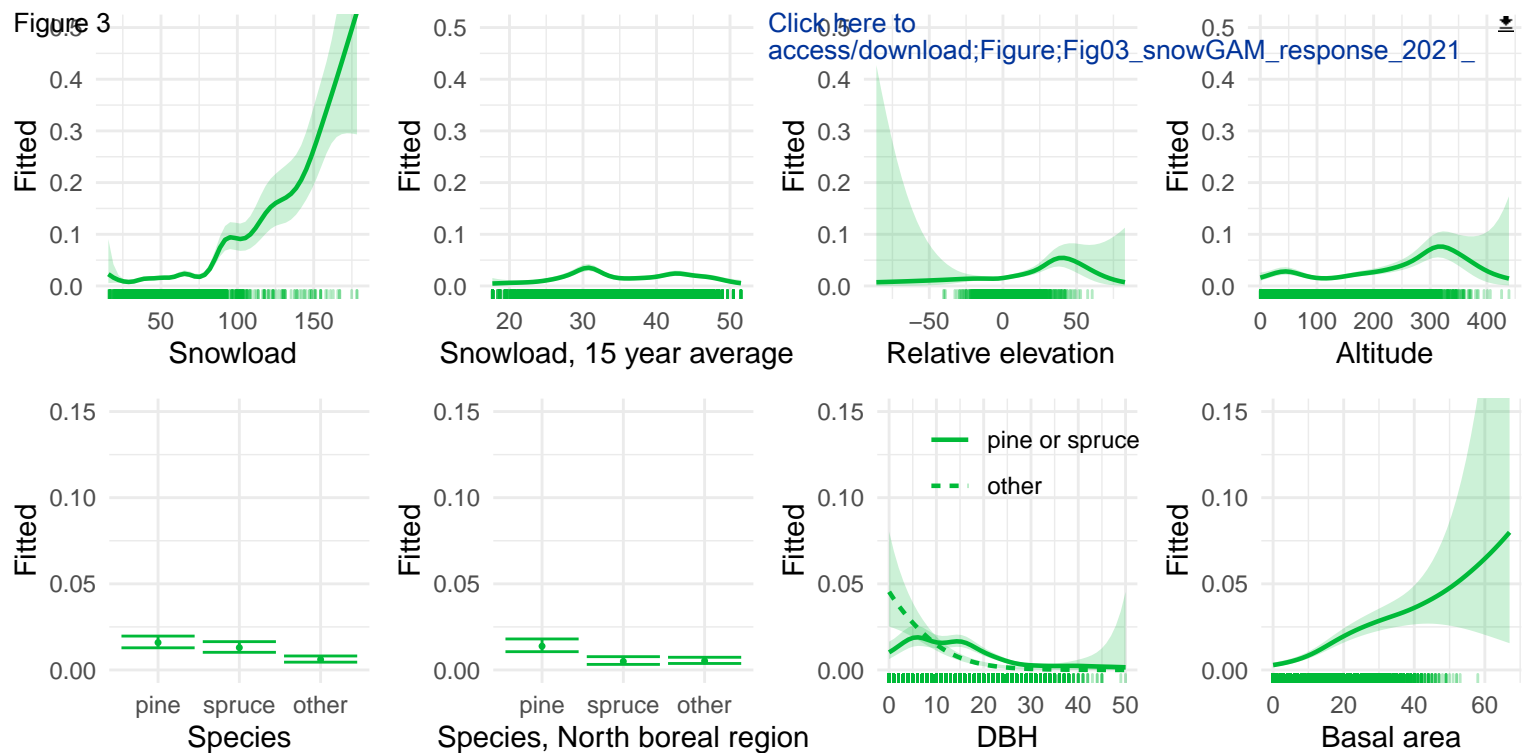

Figure 4

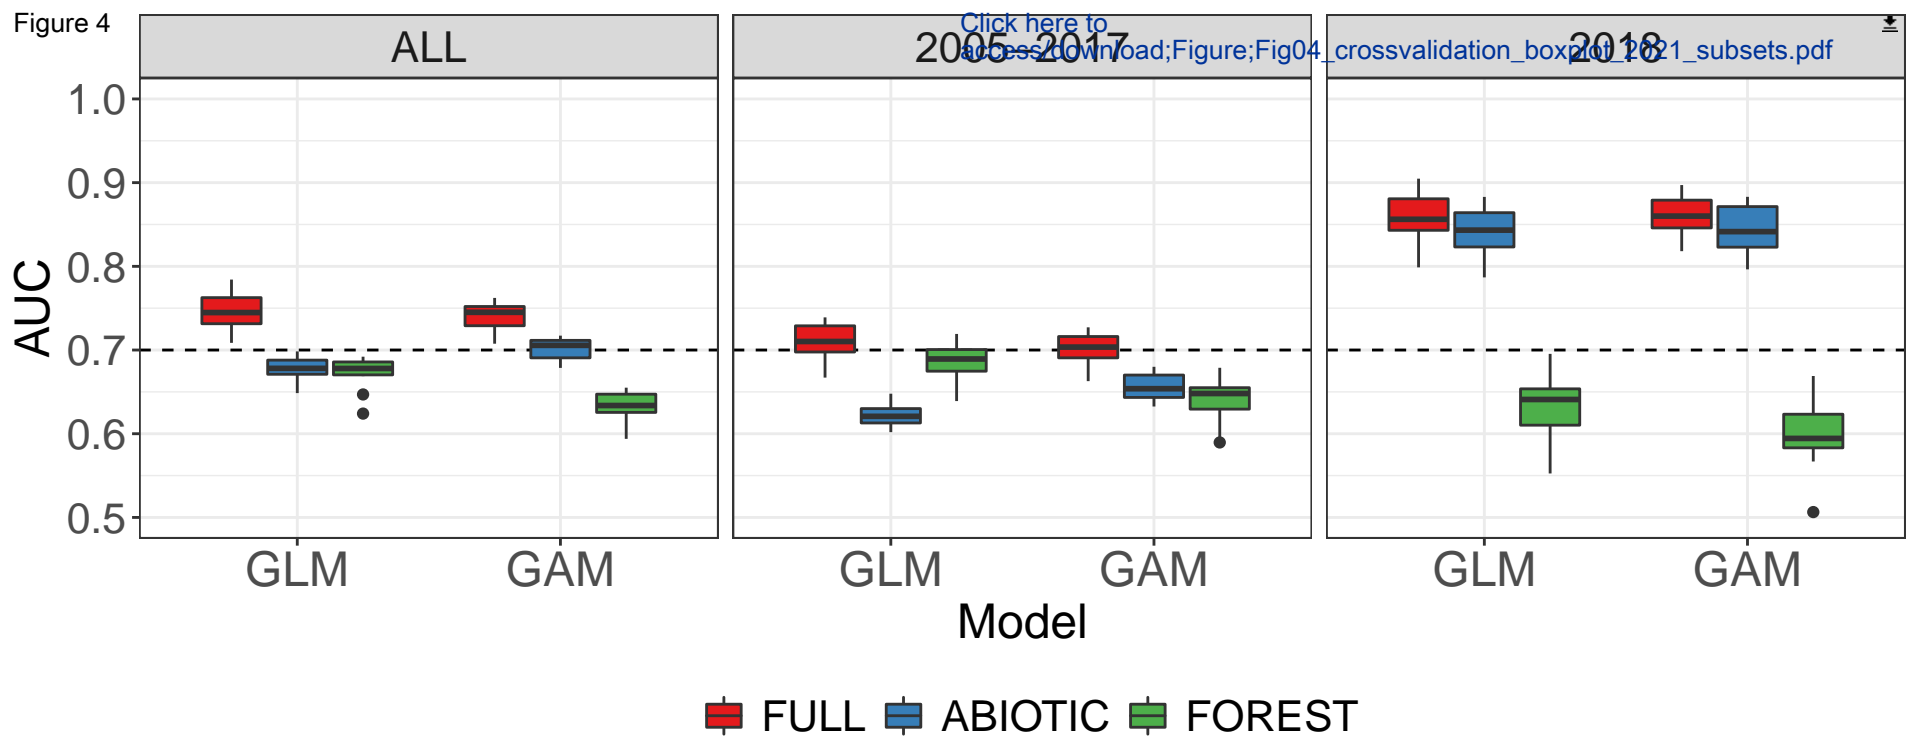

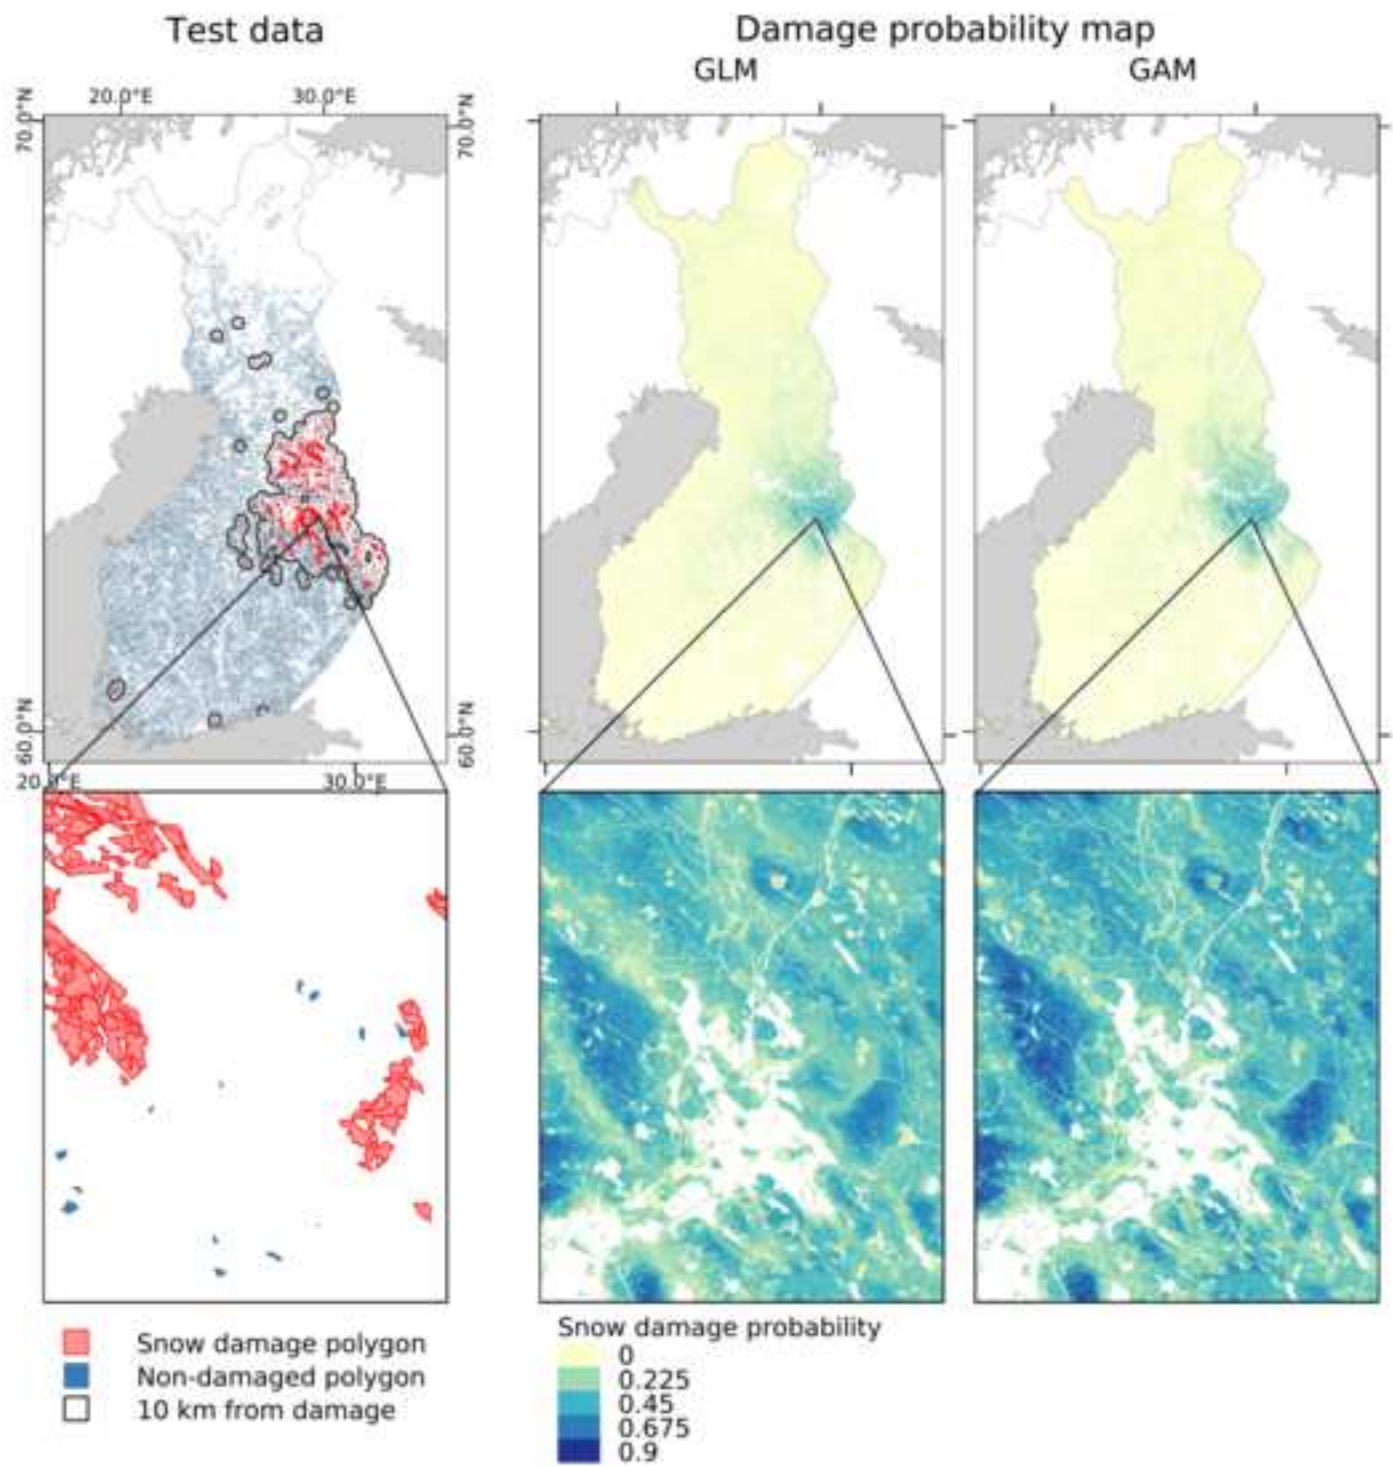

Figure 6

[Click here to access/download;Figure;Fig06\\_map\\_test\\_ro](#)

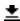

A

B

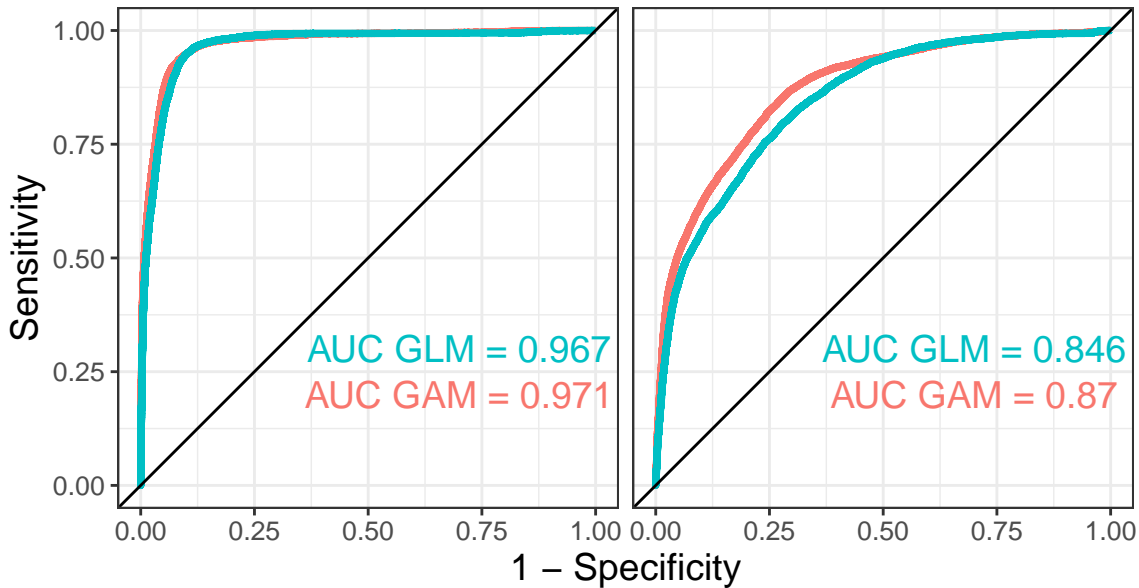



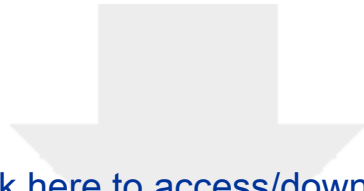

[Click here to access/download](#)

**Supporting Information**

[Supp1\\_Model\\_selection\\_details.pdf](#)

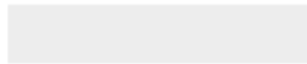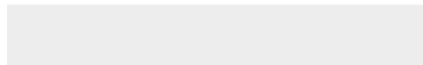

Supplement: pone.0254876.s002.pdf [file pone.0254876.s002.pdf]
