# Supplementary material for: Mapping the probability of forest snow disturbances in Finland
Source: PubMed Central journal article supplement (PMC8321231; doi:10.1371/journal.pone.0254876), 2021-07-29
Supplement: pone.0254876.s001.pdf [file pone.0254876.s001.pdf]

# Supplementary material: Details of model selection

Suvanto et al. Mapping the probability of forest snow disturbances in Finland

## 1. Summary

The model predictors were chosen based on:

1. existing understanding of snow damage dynamics,
2. availability of national extent GIS-data to be used for map prediction,
3. statistical significance of highest order terms in model, requiring significance on the level of  $p < 0.01$ .
4. improvement in AIC when comparing alternative models and
5. collinearity between predictors, generalized variation inflation factor (GVIF)  $< 4$ .

Table 1: Variables considered in model selection and reasons for exclusion from the final model (see numbering above).

| variable_name             | description                                          | included | reason  |
|---------------------------|------------------------------------------------------|----------|---------|
| species_spruce            | Dominant species spruce (ref.class=pine)             | yes      | –       |
| species_other             | Dominant species other (ref.class=pine)              | yes      | –       |
| dbh                       | Diameter at breast height (DBH)                      | yes      | –       |
| basalarea                 | Basal area                                           | yes      | –       |
| north                     | North boreal zone (0/1)                              | yes      | –       |
| snowload_longterm         | Longterm average of max. snow load                   | yes      | –       |
| snowload                  | Snowload                                             | yes      | –       |
| relelev_1km               | Relative elevation                                   | yes      | –       |
| dem                       | Altitude                                             | yes      | –       |
| species_other:dbh         | Interaction: Species, other x DBH                    | yes      | –       |
| species_spruce:north      | Interaction: Species, spruce x North boreal zone     | yes      | –       |
| species                   | Dominant species (ref.class=pine, 2=spruce, 3=other) | no       | 3       |
| harvennus_yli5v           | Thinning, > 5 yr                                     | no       | 3, 4    |
| ensiharvennus_yli5v       | Precommercial thinning, >5 yr                        | no       | 3, 4    |
| taimihoito_yli5v          | Tending of seedling stands, >5 yr                    | no       | 2       |
| keskipit                  | Average tree height                                  | no       | 5, 3, 4 |
| kptyyp_2class             | Site type                                            | no       | 3, 4    |
| species:basalarea         | Interaction: Species x Basal area                    | no       | 3       |
| species:dbh               | Interaction: Species x DBH                           | no       | 3       |
| snowload:north            | Interaction: Snowload x North boreal zone            | no       | 3, 4    |
| north:dbh                 | Interaction: North x DBH                             | no       | 3       |
| north:species             | Interaction: North x Species                         | no       | 3       |
| snowload_longterm:species | Interaction: Longterm snowload x Species             | no       | 3, 4    |
| n_species                 | Number of species                                    | no       | 2, 3    |
| max_sp_percent            | Share of BA by dominant species                      | no       | 3       |
| shannon_div               | Shannon diversity index, calculated from species BA  | no       | 2       |

For continuous variables with non-negative values log transformation was tested and kept in the model if produced a lower AIC.

Results for the variables not included in the final model are presented below.

## 2. Thinning, > 5 years

Variable describes whether some type of thinning has been carried out at the stand more than five years ago (TRUE/FALSE).

Table 2: Model with variable “Thinning, > 5 years” (harvennus\_yli5v)

|                      | Estimate   | Std. Error | z value     | Pr(> z )  |
|----------------------|------------|------------|-------------|-----------|
| (Intercept)          | -7.6807848 | 0.1333161  | -57.6133418 | 0.0000000 |
| species2             | -0.3410196 | 0.0543925  | -6.2696075  | 0.0000000 |
| species3             | -0.4943257 | 0.0809380  | -6.1074608  | 0.0000000 |
| dbh                  | -0.0741110 | 0.0043993  | -16.8462490 | 0.0000000 |
| log(basalarea + 0.5) | 1.0774641  | 0.0478825  | 22.5022435  | 0.0000000 |
| harvennus_yli5vTRUE  | 0.0087776  | 0.0848957  | 0.1033928   | 0.9176512 |
| snowload             | 0.0290434  | 0.0008957  | 32.4264434  | 0.0000000 |
| relelev_1km          | 0.0283242  | 0.0023644  | 11.9796878  | 0.0000000 |
| dem                  | 0.0038793  | 0.0003447  | 11.2549892  | 0.0000000 |

Table 3: AIC values for models with and without variable “Thinning, > 5 years” (harvennus\_yli5v)

|                 | df | AIC      |
|-----------------|----|----------|
| snowglm_with    | 9  | 20760.39 |
| snowglm_without | 8  | 20758.40 |

## 3. Precommercial thinning, > 5 years

Variable describes whether precommercial thinning has been carried out at the stand more than five years ago (TRUE/FALSE).

Table 4: Model with variable “Precommercial thinning, > 5 years” (ensiharvennus\_yli5v)

|                         | Estimate   | Std. Error | z value     | Pr(> z )  |
|-------------------------|------------|------------|-------------|-----------|
| (Intercept)             | -7.6835003 | 0.1333067  | -57.6377688 | 0.0000000 |
| species2                | -0.3390768 | 0.0544250  | -6.2301692  | 0.0000000 |
| species3                | -0.4929056 | 0.0809425  | -6.0895756  | 0.0000000 |
| dbh                     | -0.0743611 | 0.0043538  | -17.0797438 | 0.0000000 |
| log(basalarea + 0.5)    | 1.0781589  | 0.0478272  | 22.5427833  | 0.0000000 |
| ensiharvennus_yli5vTRUE | 0.0900984  | 0.0995052  | 0.9054644   | 0.3652194 |
| snowload                | 0.0290292  | 0.0008957  | 32.4090946  | 0.0000000 |
| relelev_1km             | 0.0282868  | 0.0023647  | 11.9622755  | 0.0000000 |

|     | Estimate  | Std. Error | z value    | Pr(> z )  |
|-----|-----------|------------|------------|-----------|
| dem | 0.0038899 | 0.0003442  | 11.3026707 | 0.0000000 |

Table 5: AIC values for models with and without variable “Pre-commercial thinning, > 5 years” (ensiharvennus\_yli5v)

|                    | df | AIC     |
|--------------------|----|---------|
| snowglm_with_yli5v | 9  | 20759.6 |
| snowglm_without    | 8  | 20758.4 |

## 4. Tending of seedling stands, > 5 years

Variable describes whether tending of seedling stand has been carried out at the stand more than five years ago (TRUE/FALSE).

Table 6: Model with variable “Tending of seedling stand, > 5 years” (taimihoito\_yli5v)

|                      | Estimate   | Std. Error | z value    | Pr(> z )  |
|----------------------|------------|------------|------------|-----------|
| (Intercept)          | -7.6613039 | 0.1328692  | -57.660477 | 0.0000000 |
| species2             | -0.3375008 | 0.0543976  | -6.204327  | 0.0000000 |
| species3             | -0.4910299 | 0.0809519  | -6.065703  | 0.0000000 |
| dbh                  | -0.0766650 | 0.0044058  | -17.400812 | 0.0000000 |
| log(basalarea + 0.5) | 1.0913073  | 0.0478653  | 22.799540  | 0.0000000 |
| taimihoito_yli5vTRUE | -0.3319052 | 0.1062829  | -3.122846  | 0.0017911 |
| snowload             | 0.0290211  | 0.0008961  | 32.386015  | 0.0000000 |
| relelev_1km          | 0.0285544  | 0.0023641  | 12.078324  | 0.0000000 |
| dem                  | 0.0038746  | 0.0003434  | 11.281679  | 0.0000000 |

Table 7: AIC values for models with and without variable “Tending of seedling stand, > 5 years” (taimihoito\_yli5v)

|                 | df | AIC      |
|-----------------|----|----------|
| snowglm_with2   | 9  | 20749.76 |
| snowglm_without | 8  | 20758.40 |

## 5. Average tree height

The variable describes the average tree height of the stand (dm).

Table 8: Model with variable “Tree height” (keskipit)

|             | Estimate   | Std. Error | z value    | Pr(> z ) |
|-------------|------------|------------|------------|----------|
| (Intercept) | -7.6809409 | 0.1307901  | -58.727217 | 0        |
| species2    | -0.3790882 | 0.0547601  | -6.922711  | 0        |

|                      | Estimate   | Std. Error | z value    | Pr(> z ) |
|----------------------|------------|------------|------------|----------|
| species3             | -0.6434476 | 0.0835773  | -7.698831  | 0        |
| dbh                  | -0.1367818 | 0.0095640  | -14.301765 | 0        |
| log(basalarea + 0.5) | 0.9325585  | 0.0500466  | 18.633819  | 0        |
| keskipit             | 0.0095572  | 0.0012630  | 7.567300   | 0        |
| snowload             | 0.0290278  | 0.0008921  | 32.539084  | 0        |
| relelev_1km          | 0.0280500  | 0.0023792  | 11.789502  | 0        |
| dem                  | 0.0048769  | 0.0003767  | 12.946961  | 0        |

Table 9: AIC values for models with and without variable “Tree height” (keskipit)

|                 | df | AIC      |
|-----------------|----|----------|
| snowglm_with    | 9  | 20702.31 |
| snowglm_without | 8  | 20758.40 |

Table 10: Variation inflation factors (GVIF) for model with variable “Tree height” (keskipit)

|                      | GVIF     | Df | GVIF <sup>1/(2*Df)</sup> |
|----------------------|----------|----|--------------------------|
| species              | 1.119909 | 2  | 1.028716                 |
| dbh                  | 8.290128 | 1  | 2.879258                 |
| log(basalarea + 0.5) | 2.110775 | 1  | 1.452851                 |
| keskipit             | 9.902194 | 1  | 3.146775                 |
| snowload             | 1.180355 | 1  | 1.086442                 |
| relelev_1km          | 1.054602 | 1  | 1.026938                 |
| dem                  | 1.476089 | 1  | 1.214944                 |

Table 11: Model with variable “Tree height” (keskipit) while excluding DBH.

|                      | Estimate   | Std. Error | z value    | Pr(> z ) |
|----------------------|------------|------------|------------|----------|
| (Intercept)          | -7.5311012 | 0.1318312  | -57.126832 | 0.00e+00 |
| species2             | -0.3465196 | 0.0545486  | -6.352496  | 0.00e+00 |
| species3             | -0.3309589 | 0.0803161  | -4.120706  | 3.78e-05 |
| log(basalarea + 0.5) | 0.9772503  | 0.0512775  | 19.058072  | 0.00e+00 |
| keskipit             | -0.0069564 | 0.0005808  | -11.977487 | 0.00e+00 |
| snowload             | 0.0292368  | 0.0008934  | 32.724019  | 0.00e+00 |
| relelev_1km          | 0.0272636  | 0.0023391  | 11.655494  | 0.00e+00 |
| dem                  | 0.0027967  | 0.0003290  | 8.501453   | 0.00e+00 |

Table 12: Model with variable DBH while excluding “Tree height” (keskipit).

|             | Estimate   | Std. Error | z value    | Pr(> z ) |
|-------------|------------|------------|------------|----------|
| (Intercept) | -7.6801166 | 0.1331415  | -57.683872 | 0        |

|                      | Estimate   | Std. Error | z value    | Pr(> z ) |
|----------------------|------------|------------|------------|----------|
| species2             | -0.3411606 | 0.0543756  | -6.274153  | 0        |
| species3             | -0.4944811 | 0.0809239  | -6.110442  | 0        |
| dbh                  | -0.0740317 | 0.0043307  | -17.094747 | 0        |
| log(basalarea + 0.5) | 1.0771217  | 0.0477597  | 22.552942  | 0        |
| snowload             | 0.0290449  | 0.0008956  | 32.431754  | 0        |
| relelev_1km          | 0.0283292  | 0.0023638  | 11.984654  | 0        |
| dem                  | 0.0038766  | 0.0003437  | 11.280454  | 0        |

Table 13: AIC values for models with either Tree height (keskipit) or DBH included.

|                  | df | AIC      |
|------------------|----|----------|
| snowglm_keskipit | 8  | 20928.56 |
| snowglm_dbh      | 8  | 20758.40 |

Table 14: Variation inflation factors (GVIF) for model with variable Tree height" (keskipit) while excluding DBH.

|                      | GVIF     | Df | GVIF <sup>1/(2*Df)</sup> |
|----------------------|----------|----|--------------------------|
| species              | 1.035841 | 2  | 1.008842                 |
| log(basalarea + 0.5) | 2.018151 | 1  | 1.420616                 |
| keskipit             | 2.034260 | 1  | 1.426275                 |
| snowload             | 1.186678 | 1  | 1.089348                 |
| relelev_1km          | 1.062092 | 1  | 1.030578                 |
| dem                  | 1.281239 | 1  | 1.131918                 |

Table 15: Variation inflation factors (GVIF) for model with variable DBH while excluding "Tree height" (keskipit).

|                      | GVIF     | Df | GVIF <sup>1/(2*Df)</sup> |
|----------------------|----------|----|--------------------------|
| species              | 1.042045 | 2  | 1.010350                 |
| dbh                  | 1.736970 | 1  | 1.317941                 |
| log(basalarea + 0.5) | 1.774385 | 1  | 1.332061                 |
| snowload             | 1.182050 | 1  | 1.087221                 |
| relelev_1km          | 1.058808 | 1  | 1.028984                 |
| dem                  | 1.295870 | 1  | 1.138363                 |

## 6. Site type

Site type "FERTILE" or "POOR", reclassification of site type classes in the Finnish NFI (classes 1-3 = FERTILE, classes > 3 = POOR).

Table 16: Model with variable “Site type” (kptyyp\_2class)

|                      | Estimate   | Std. Error | z value     | Pr(> z )  |
|----------------------|------------|------------|-------------|-----------|
| (Intercept)          | -7.6708986 | 0.1411311  | -54.3530000 | 0.0000000 |
| species2             | -0.3453836 | 0.0584837  | -5.9056382  | 0.0000000 |
| species3             | -0.4986814 | 0.0837127  | -5.9570607  | 0.0000000 |
| dbh                  | -0.0740416 | 0.0043304  | -17.0980150 | 0.0000000 |
| log(basalarea + 0.5) | 1.0757593  | 0.0482355  | 22.3022110  | 0.0000000 |
| kptyyp_2classPOOR    | -0.0096050 | 0.0490838  | -0.1956861  | 0.8448558 |
| snowload             | 0.0290470  | 0.0008957  | 32.4299531  | 0.0000000 |
| relelev_1km          | 0.0282998  | 0.0023685  | 11.9482003  | 0.0000000 |
| dem                  | 0.0038734  | 0.0003440  | 11.2604828  | 0.0000000 |

Table 17: AIC values for models with and without variable “Site type” (kptyyp\_2class)

|                 | df | AIC      |
|-----------------|----|----------|
| snowglm_with    | 9  | 20760.36 |
| snowglm_without | 8  | 20758.40 |

## 7. Interactions: Species x DBH or Basal area

Interactions between two predictors:

- Species x DBH
- Species x Basal area

Table 18: Model with interaction Species x DBH

|                      | Estimate   | Std. Error | z value    | Pr(> z )  |
|----------------------|------------|------------|------------|-----------|
| (Intercept)          | -7.6890780 | 0.1394996  | -55.119006 | 0.0000000 |
| species2             | -0.5927490 | 0.1407292  | -4.211982  | 0.0000253 |
| species3             | 0.6395325  | 0.2183468  | 2.928975   | 0.0034008 |
| dbh                  | -0.0746229 | 0.0050388  | -14.809710 | 0.0000000 |
| log(basalarea + 0.5) | 1.0833878  | 0.0479459  | 22.596030  | 0.0000000 |
| snowload             | 0.0291418  | 0.0008985  | 32.432293  | 0.0000000 |
| relelev_1km          | 0.0281579  | 0.0023666  | 11.897829  | 0.0000000 |
| dem                  | 0.0038479  | 0.0003437  | 11.195885  | 0.0000000 |
| species2:dbh         | 0.0139089  | 0.0073270  | 1.898313   | 0.0576548 |
| species3:dbh         | -0.0877992 | 0.0165816  | -5.294979  | 0.0000001 |

Table 19: Model with interaction Species x Basal area

|             | Estimate   | Std. Error | z value     | Pr(> z )  |
|-------------|------------|------------|-------------|-----------|
| (Intercept) | -7.9718471 | 0.1597659  | -49.8970604 | 0.0000000 |
| species2    | -0.2182899 | 0.2551237  | -0.8556238  | 0.3922059 |
| species3    | 1.8375482  | 0.2872057  | 6.3980212   | 0.0000000 |

|                               | Estimate   | Std. Error | z value     | Pr(> z )  |
|-------------------------------|------------|------------|-------------|-----------|
| dbh                           | -0.0761704 | 0.0043713  | -17.4251090 | 0.0000000 |
| log(basalarea + 0.5)          | 1.1856997  | 0.0562248  | 21.0885598  | 0.0000000 |
| snowload                      | 0.0291187  | 0.0008965  | 32.4804245  | 0.0000000 |
| relelev_1km                   | 0.0281458  | 0.0023636  | 11.9079099  | 0.0000000 |
| dem                           | 0.0039801  | 0.0003446  | 11.5489101  | 0.0000000 |
| species2:log(basalarea + 0.5) | -0.0450562 | 0.0856941  | -0.5257793  | 0.5990416 |
| species3:log(basalarea + 0.5) | -0.8526833 | 0.1055349  | -8.0796311  | 0.0000000 |

Table 20: AIC values for models with interaction Species x BA, with interaction Species x DBH and without interactions.

|                 | df | AIC      |
|-----------------|----|----------|
| snowglm_withBA  | 10 | 20710.78 |
| snowglm_withDBH | 10 | 20725.53 |
| snowglm_without | 8  | 20758.40 |

## 8. North boreal zone and interactions

Adding the north boreal zone ('north') into the model.

### 8.1 North

Table 21: Model with variable 'north' describing if plot located in north boreal zone.

|                      | Estimate   | Std. Error | z value    | Pr(> z )  |
|----------------------|------------|------------|------------|-----------|
| (Intercept)          | -7.7207920 | 0.1329452  | -58.075010 | 0.0000000 |
| species2             | -0.3473889 | 0.0544970  | -6.374455  | 0.0000000 |
| species3             | -0.4952526 | 0.0809362  | -6.119046  | 0.0000000 |
| dbh                  | -0.0737315 | 0.0043357  | -17.005868 | 0.0000000 |
| log(basalarea + 0.5) | 1.0816260  | 0.0482313  | 22.425796  | 0.0000000 |
| snowload             | 0.0289589  | 0.0008986  | 32.227654  | 0.0000000 |
| relelev_1km          | 0.0280042  | 0.0023811  | 11.761227  | 0.0000000 |
| dem                  | 0.0041480  | 0.0004152  | 9.990217   | 0.0000000 |
| north                | -0.0739752 | 0.0663517  | -1.114895  | 0.2648954 |

Table 22: AIC values for models with and without variable 'north'.

|                 | df | AIC      |
|-----------------|----|----------|
| snowglm_without | 8  | 20757.61 |
| snowglm_with    | 9  | 20758.36 |

## 8.2 North x snowload

Testing interaction with snowload, as northern trees, adapted to heavy snowloads, could response to snowload differently.

Table 23: Model with interaction north x snowload

|                      | Estimate   | Std. Error | z value    | Pr(> z )  |
|----------------------|------------|------------|------------|-----------|
| (Intercept)          | -7.7048499 | 0.1335721  | -57.683082 | 0.0000000 |
| species2             | -0.3489004 | 0.0544964  | -6.402259  | 0.0000000 |
| species3             | -0.4957242 | 0.0809140  | -6.126555  | 0.0000000 |
| dbh                  | -0.0738949 | 0.0043380  | -17.034431 | 0.0000000 |
| log(basalarea + 0.5) | 1.0818972  | 0.0482135  | 22.439695  | 0.0000000 |
| snowload             | 0.0286110  | 0.0009489  | 30.152055  | 0.0000000 |
| relelev_1km          | 0.0279844  | 0.0023832  | 11.742412  | 0.0000000 |
| dem                  | 0.0041992  | 0.0004177  | 10.052605  | 0.0000000 |
| north                | -0.3232467 | 0.2235972  | -1.445665  | 0.1482712 |
| snowload:north       | 0.0034789  | 0.0029661  | 1.172865   | 0.2408501 |

Table 24: AIC values for models with and without interaction north x species

|                 | df | AIC      |
|-----------------|----|----------|
| snowglm_without | 8  | 20757.61 |
| snowglm_with    | 10 | 20758.99 |

## 8.3 North x DBH

Testing interaction with DBH, as northern trees, adapted to heavy snowloads, could have different pattern of DBH effect on damage probability.

Table 25: Model with interaction north x DBH

|                      | Estimate   | Std. Error | z value    | Pr(> z )  |
|----------------------|------------|------------|------------|-----------|
| (Intercept)          | -7.6770374 | 0.1354296  | -56.686537 | 0.0000000 |
| species2             | -0.3506124 | 0.0544991  | -6.433363  | 0.0000000 |
| species3             | -0.4980986 | 0.0809638  | -6.152114  | 0.0000000 |
| dbh                  | -0.0763828 | 0.0046608  | -16.388475 | 0.0000000 |
| log(basalarea + 0.5) | 1.0844146  | 0.0482347  | 22.482029  | 0.0000000 |
| snowload             | 0.0289710  | 0.0008988  | 32.234397  | 0.0000000 |
| relelev_1km          | 0.0279410  | 0.0023786  | 11.746599  | 0.0000000 |
| dem                  | 0.0040873  | 0.0004170  | 9.801631   | 0.0000000 |
| north                | -0.2778253 | 0.1465753  | -1.895444  | 0.0580336 |
| dbh:north            | 0.0131626  | 0.0083709  | 1.572416   | 0.1158540 |



Table 26: AIC values for models with and without interaction north x DBH

|                 | df | AIC      |
|-----------------|----|----------|
| snowglm_without | 8  | 20757.61 |
| snowglm_with    | 10 | 20757.88 |

## 8.4 North x Species

Testing interaction with DBH, as different adaptations to northern conditions are known between species, morphological adaptation being especially clear in Norway spruce.

Table 27: Model with interaction north x species

|                      | Estimate   | Std. Error | z value     | Pr(> z )  |
|----------------------|------------|------------|-------------|-----------|
| (Intercept)          | -7.7690642 | 0.1331775  | -58.3361554 | 0.0000000 |
| species2             | -0.2531935 | 0.0578732  | -4.3749697  | 0.0000121 |
| species3             | -0.4178832 | 0.0851977  | -4.9048672  | 0.0000009 |
| dbh                  | -0.0727090 | 0.0043321  | -16.7838777 | 0.0000000 |
| log(basalarea + 0.5) | 1.0756412  | 0.0481114  | 22.3572976  | 0.0000000 |
| snowload             | 0.0289123  | 0.0008991  | 32.1558917  | 0.0000000 |
| relelev_1km          | 0.0273759  | 0.0023876  | 11.4657034  | 0.0000000 |
| dem                  | 0.0043324  | 0.0004181  | 10.3625481  | 0.0000000 |
| north                | 0.0213918  | 0.0687567  | 0.3111231   | 0.7557071 |
| species2:north       | -0.7517200 | 0.1862165  | -4.0368058  | 0.0000542 |
| species3:north       | -0.5686186 | 0.2803981  | -2.0278977  | 0.0425707 |

Table 28: AIC values for models with and without interaction north x DBH

|                 | df | AIC      |
|-----------------|----|----------|
| snowglm_without | 8  | 20757.61 |
| snowglm_with    | 11 | 20740.17 |

## 9. Long term snowload x species

Testing the interaction between long term snowload (15 years average of winter max) and species, as Norway spruce shows clearer morphological differentiation with latitude and could therefore show species-specific reponse to long-term snowload.

Table 29: Model with interaction Long term snowload x species

|                      | Estimate   | Std. Error | z value     | Pr(> z )  |
|----------------------|------------|------------|-------------|-----------|
| (Intercept)          | -7.2849719 | 0.1841717  | -39.5553273 | 0.0000000 |
| species_spruce       | 0.1068927  | 0.2860188  | 0.3737262   | 0.7086080 |
| species_other        | 0.7234707  | 0.4648012  | 1.5565164   | 0.1195854 |
| dbh                  | -0.0732843 | 0.0043957  | -16.6719259 | 0.0000000 |
| log(basalarea + 0.5) | 1.1190323  | 0.0484103  | 23.1155616  | 0.0000000 |

|                                  | Estimate   | Std. Error | z value    | Pr(> z )  |
|----------------------------------|------------|------------|------------|-----------|
| snowload_longterm                | -0.0243462 | 0.0048049  | -5.0669548 | 0.0000004 |
| snowload                         | 0.0325340  | 0.0010532  | 30.8897068 | 0.0000000 |
| relelev_1km                      | 0.0270099  | 0.0023912  | 11.2953546 | 0.0000000 |
| dem                              | 0.0050485  | 0.0003924  | 12.8652716 | 0.0000000 |
| species_other:dbh                | -0.0920792 | 0.0163444  | -5.6336874 | 0.0000000 |
| species_spruce:snowload_longterm | -0.0130581 | 0.0076964  | -1.6966466 | 0.0897635 |
| species_other:snowload_longterm  | -0.0005436 | 0.0111923  | -0.0485689 | 0.9612629 |

Table 30: AIC values for models with and without interaction Long term snowload x species

|                 | df | AIC      |
|-----------------|----|----------|
| snowglm_without | 10 | 20692.53 |
| snowglm_with    | 12 | 20693.62 |

## 10. Species composition

The effect of species composition was studied with three different variables:

- number of species
- BA proportion of most abundant species (most abundant here meaning the species with largest basal area)
- Shannon diversity index (calculated from % of basal area)

Table 31: Model with number of tree species (n\_species).

|                      | Estimate   | Std. Error | z value     | Pr(> z )  |
|----------------------|------------|------------|-------------|-----------|
| (Intercept)          | -7.0574239 | 0.1313806  | -53.7173884 | 0.0000000 |
| species_spruce       | -0.2681443 | 0.0586793  | -4.5696554  | 0.0000049 |
| species_other        | 0.7433953  | 0.2149934  | 3.4577594   | 0.0005447 |
| dbh                  | -0.0728983 | 0.0043807  | -16.6406130 | 0.0000000 |
| log(basalarea + 0.5) | 1.1190169  | 0.0489719  | 22.8501796  | 0.0000000 |
| log(n_species)       | -0.1060911 | 0.0467952  | -2.2671358  | 0.0233819 |
| snowload_anomaly     | 0.0330034  | 0.0009908  | 33.3092338  | 0.0000000 |
| relelev_1km          | 0.0256751  | 0.0024017  | 10.6904942  | 0.0000000 |
| dem                  | 0.0059132  | 0.0004028  | 14.6797453  | 0.0000000 |
| north                | -0.0522483 | 0.0690748  | -0.7564027  | 0.4494078 |
| species_other:dbh    | -0.0922254 | 0.0163765  | -5.6315877  | 0.0000000 |
| species_spruce:north | -0.7439038 | 0.1860639  | -3.9981099  | 0.0000639 |

Table 32: Model with proportion of BA covered by the most abundant species (max\_sp\_percent).

|             | Estimate   | Std. Error | z value     | Pr(> z )  |
|-------------|------------|------------|-------------|-----------|
| (Intercept) | -7.3518540 | 0.1749239  | -42.0288627 | 0.0000000 |

|                      | Estimate   | Std. Error | z value     | Pr(> z )  |
|----------------------|------------|------------|-------------|-----------|
| species_spruce       | -0.2660797 | 0.0587368  | -4.5300340  | 0.0000059 |
| species_other        | 0.7380216  | 0.2143258  | 3.4434572   | 0.0005743 |
| dbh                  | -0.0728918 | 0.0043809  | -16.6385639 | 0.0000000 |
| log(basalarea + 0.5) | 1.1140774  | 0.0488026  | 22.8282622  | 0.0000000 |
| max_sp_percent       | 0.2925138  | 0.1239580  | 2.3597807   | 0.0182857 |
| snowload_anomaly     | 0.0329717  | 0.0009897  | 33.3145282  | 0.0000000 |
| relelev_1km          | 0.0255505  | 0.0024013  | 10.6401676  | 0.0000000 |
| dem                  | 0.0059055  | 0.0004028  | 14.6607314  | 0.0000000 |
| north                | -0.0477269 | 0.0689040  | -0.6926569  | 0.4885249 |
| species_other:dbh    | -0.0909531 | 0.0163410  | -5.5659568  | 0.0000000 |
| species_spruce:north | -0.7336440 | 0.1862241  | -3.9395766  | 0.0000816 |

Table 33: Model with Shannon diversity index (shannon\_div).

|                          | Estimate   | Std. Error | z value     | Pr(> z )  |
|--------------------------|------------|------------|-------------|-----------|
| (Intercept)              | -7.1817792 | 0.1360826  | -52.7751643 | 0.0000000 |
| species_spruce           | -0.2643695 | 0.0585866  | -4.5124552  | 0.0000064 |
| species_other            | 0.7476963  | 0.2146353  | 3.4835655   | 0.0004948 |
| dbh                      | -0.0727750 | 0.0043761  | -16.6300508 | 0.0000000 |
| log(basalarea + 0.5)     | 1.1190954  | 0.0488620  | 22.9031634  | 0.0000000 |
| log(shannon_div + 1e-04) | -0.0157360 | 0.0054827  | -2.8701187  | 0.0041032 |
| snowload_anomaly         | 0.0330205  | 0.0009905  | 33.3364265  | 0.0000000 |
| relelev_1km              | 0.0255899  | 0.0024028  | 10.6502298  | 0.0000000 |
| dem                      | 0.0059209  | 0.0004030  | 14.6917770  | 0.0000000 |
| north                    | -0.0536816 | 0.0690004  | -0.7779896  | 0.4365751 |
| species_other:dbh        | -0.0922571 | 0.0163489  | -5.6430204  | 0.0000000 |
| species_spruce:north     | -0.7316969 | 0.1861833  | -3.9299818  | 0.0000850 |

Table 34: AIC values of models with species community variables.

|                        | df | AIC      |
|------------------------|----|----------|
| snowglm_without        | 11 | 20674.88 |
| snowglm_n_species      | 12 | 20671.75 |
| snowglm_max_sp_percent | 12 | 20671.25 |
| snowglm_shannon        | 12 | 20668.74 |
